# Supplementary material
Source: publisher site journal article supplement (http://zookeys.pensoft.net/article/6264/download/suppl/34/)

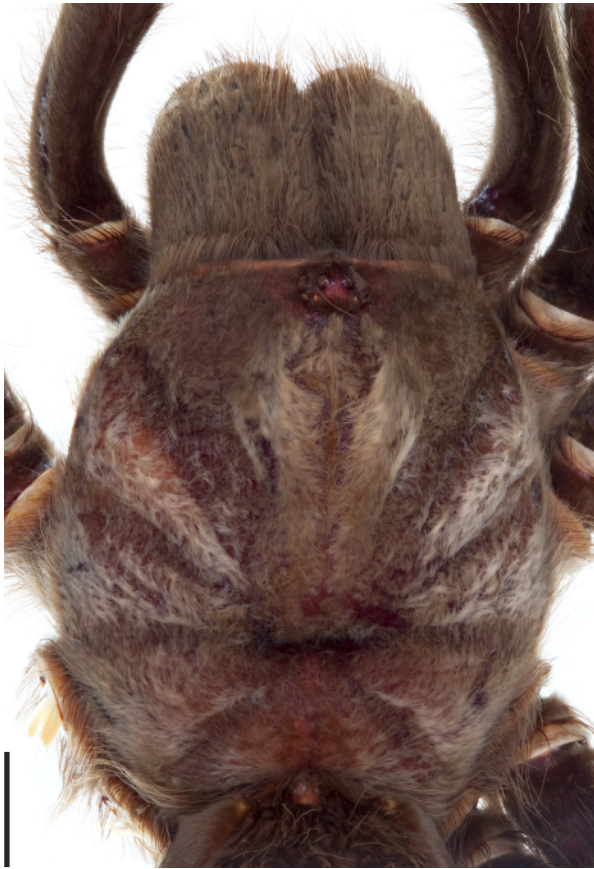

A

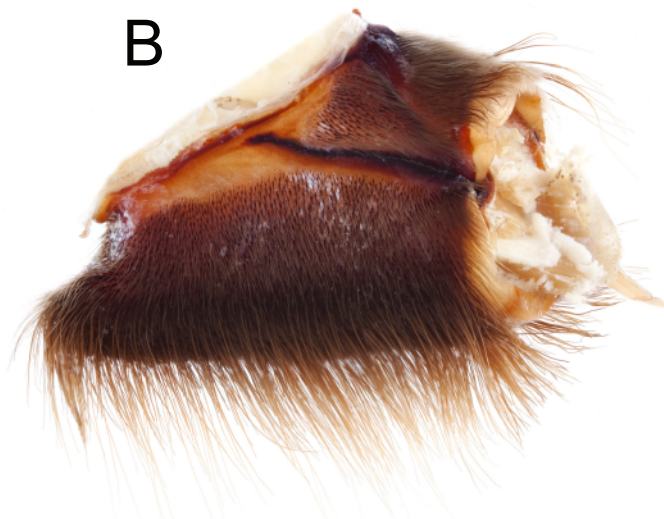

B

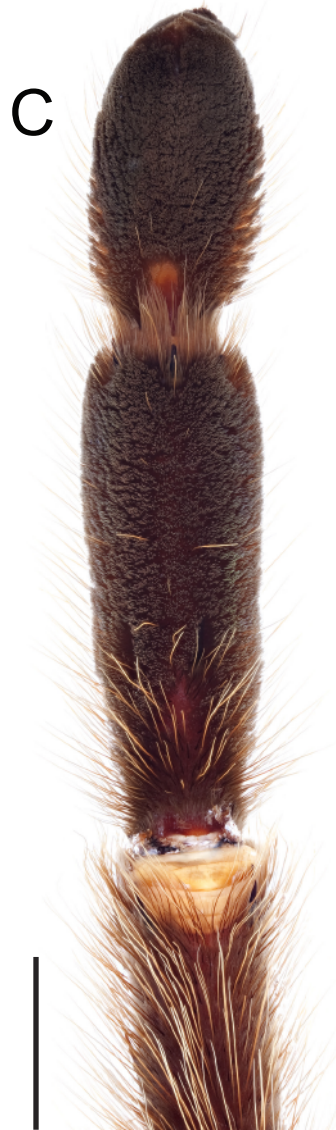

C

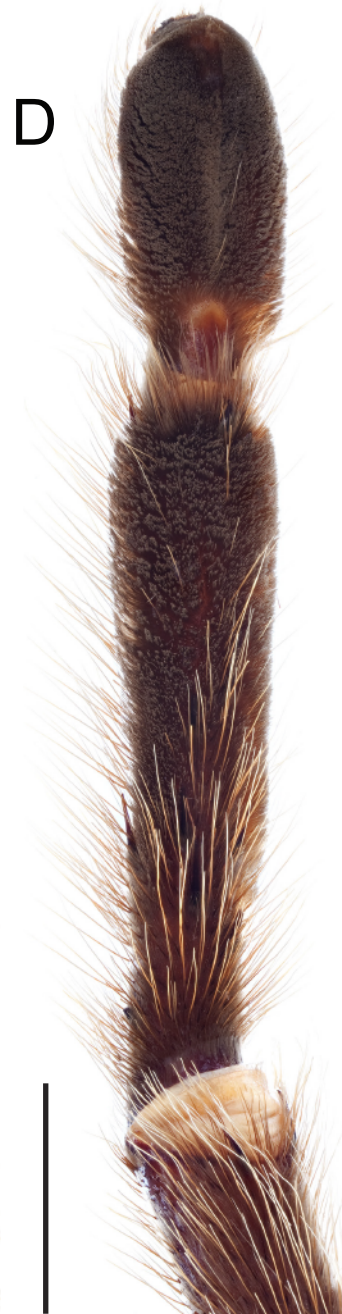

D

*Aphonopelma*  
*chalcodes*

supplemental variation

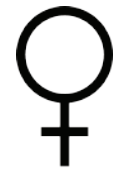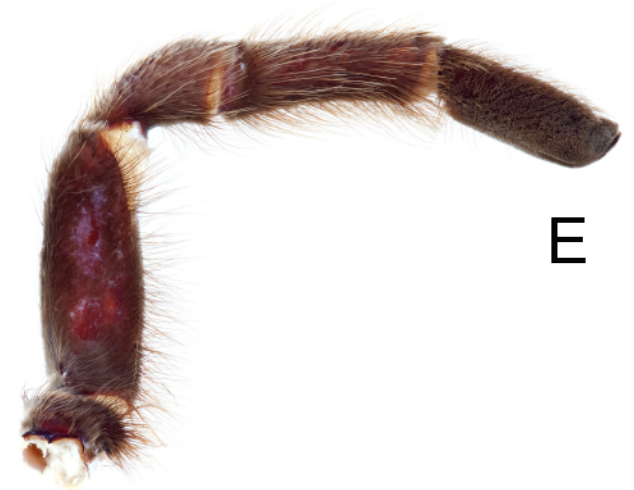

E

Supplement: Supplementary file 1

*Aphonopelma*  
*vorhiesi*

♂

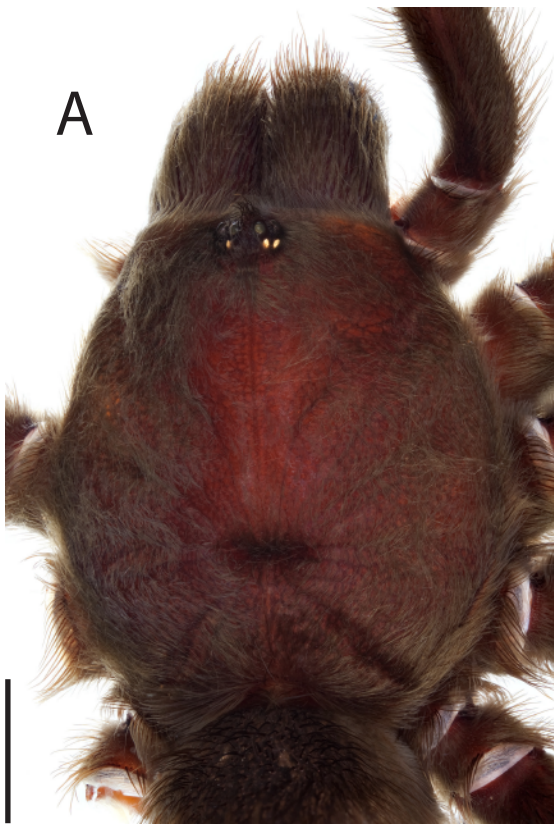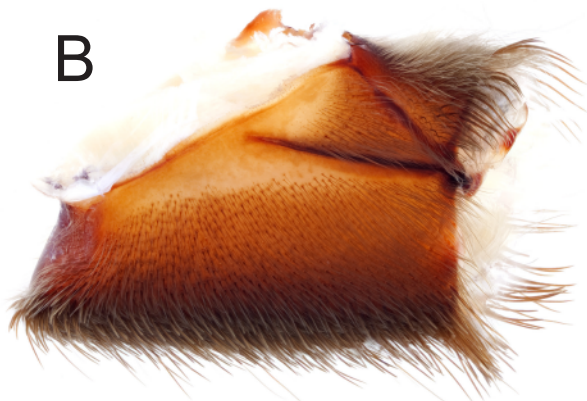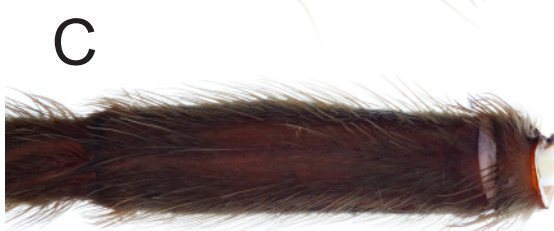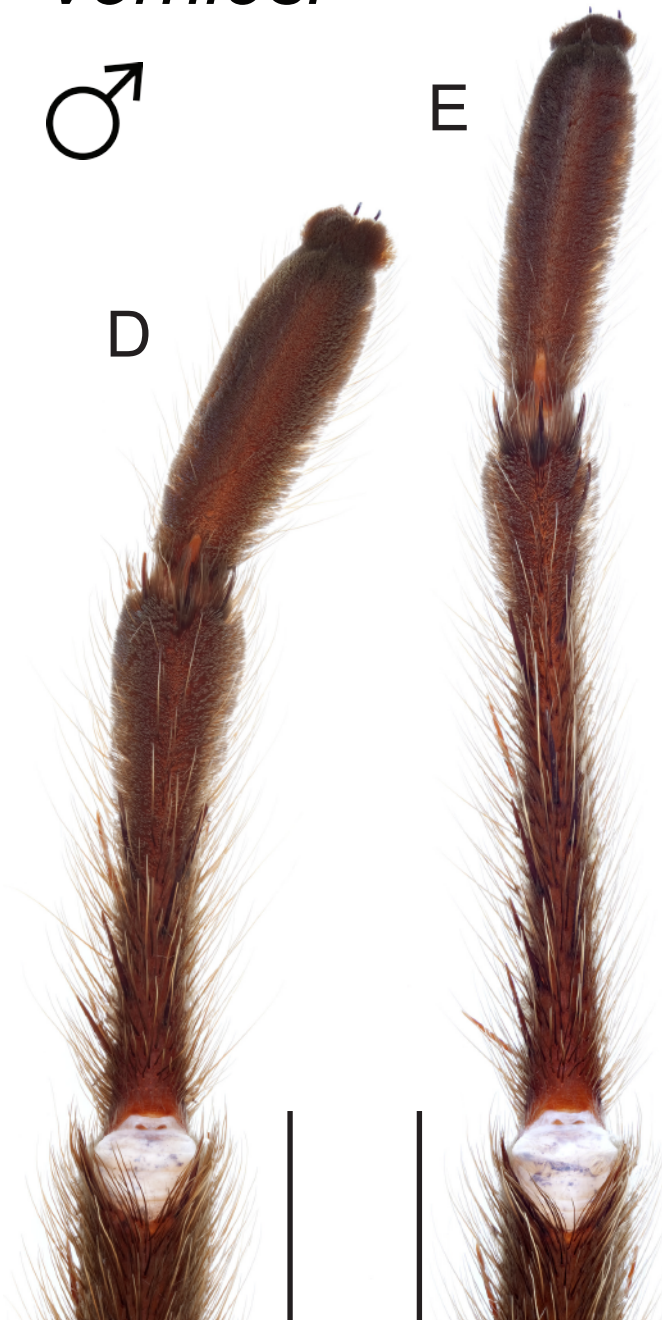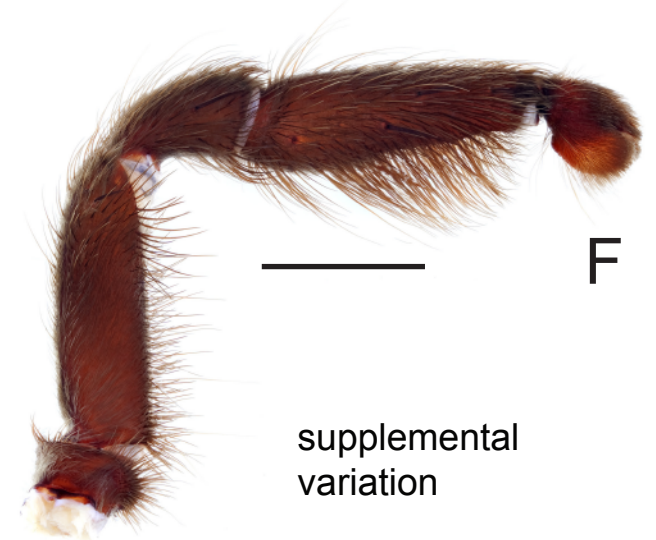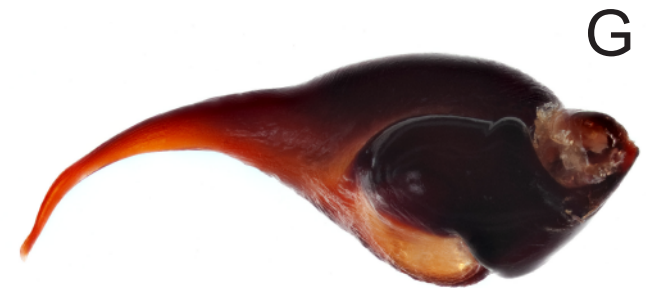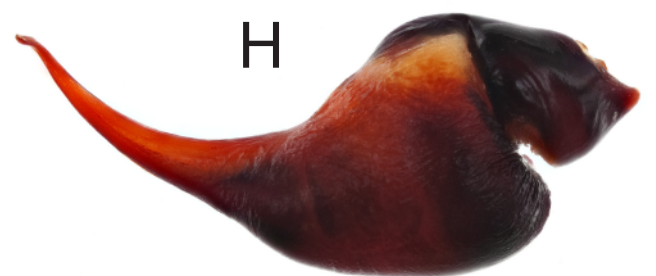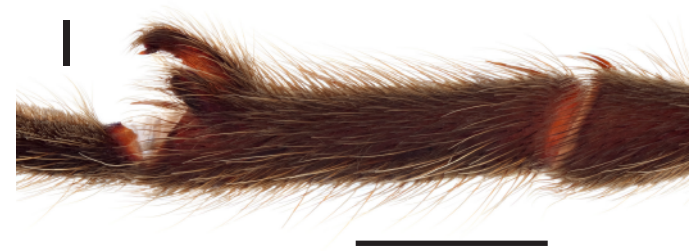

Supplement: Supplementary file 2

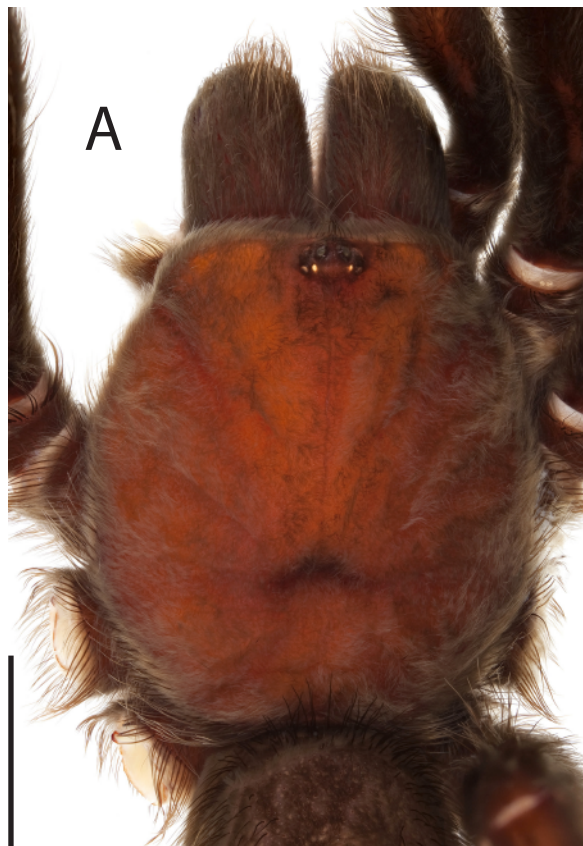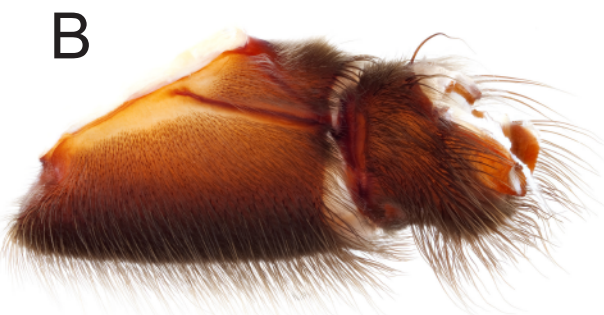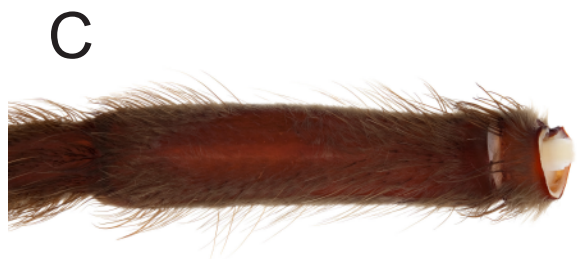

*Aphonopelma*  
*iodius*

♂

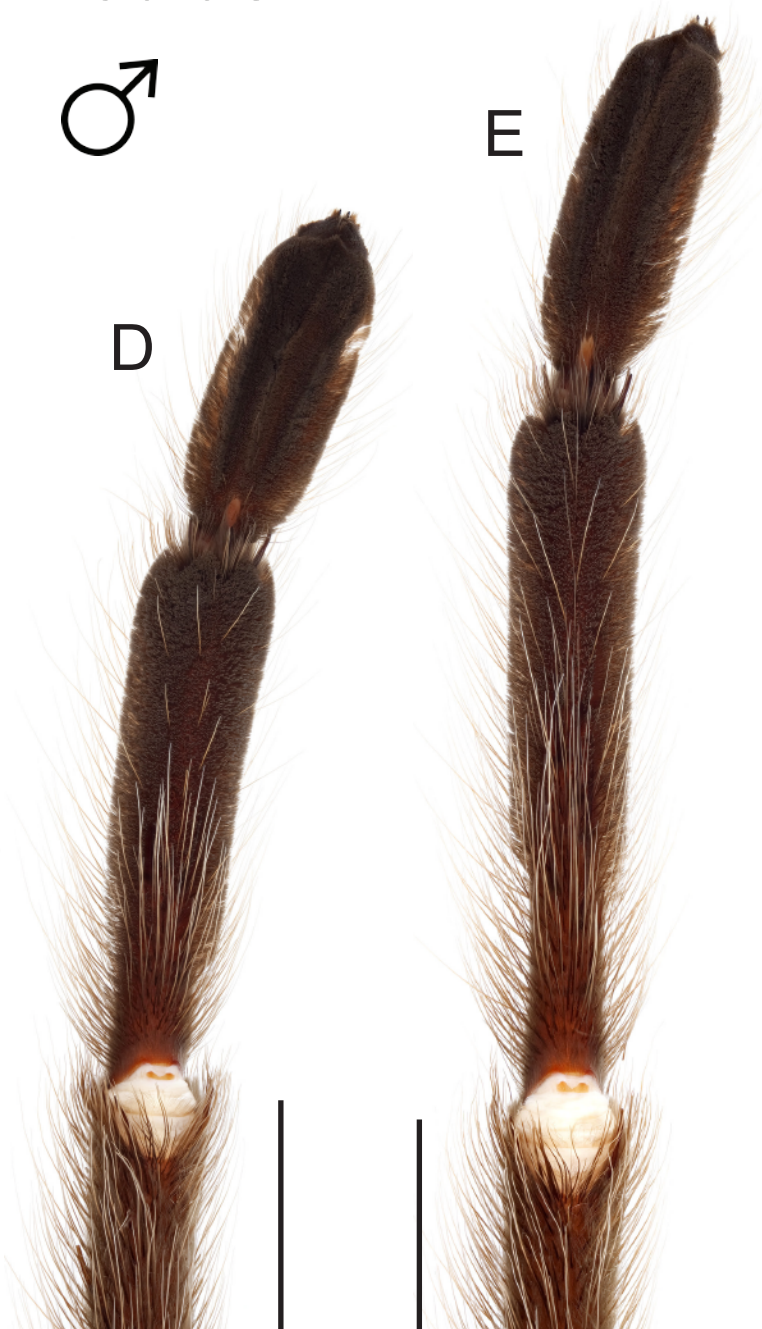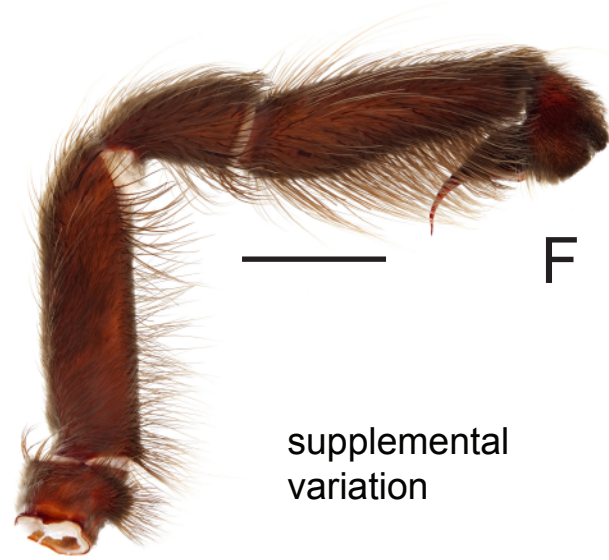

supplemental  
variation

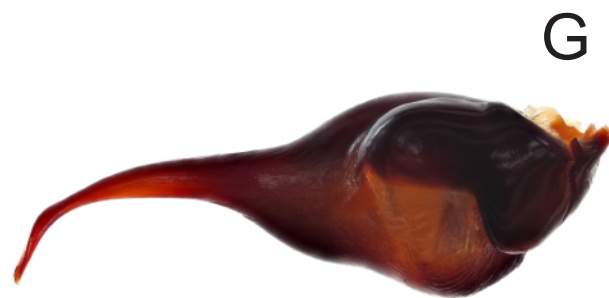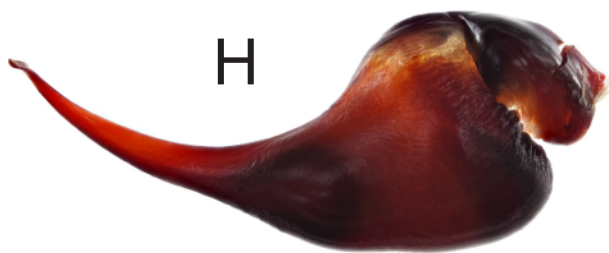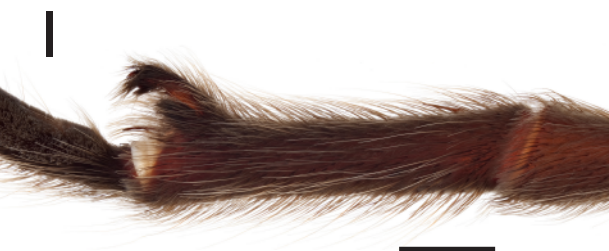

Supplement: Supplementary file 3

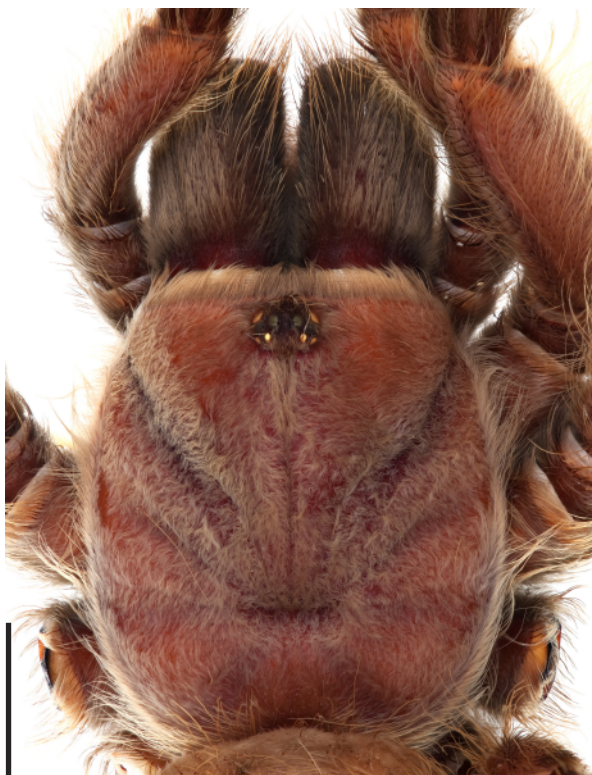

A

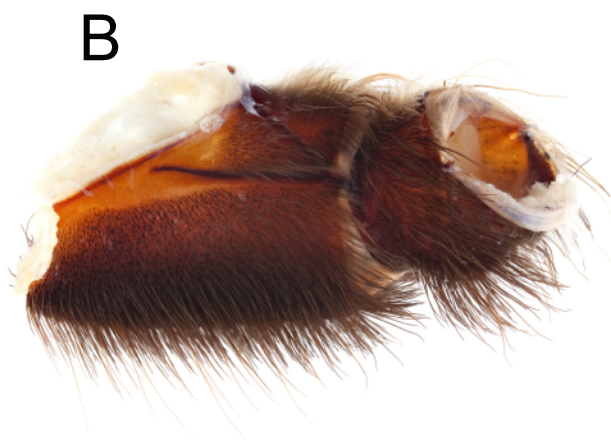

B

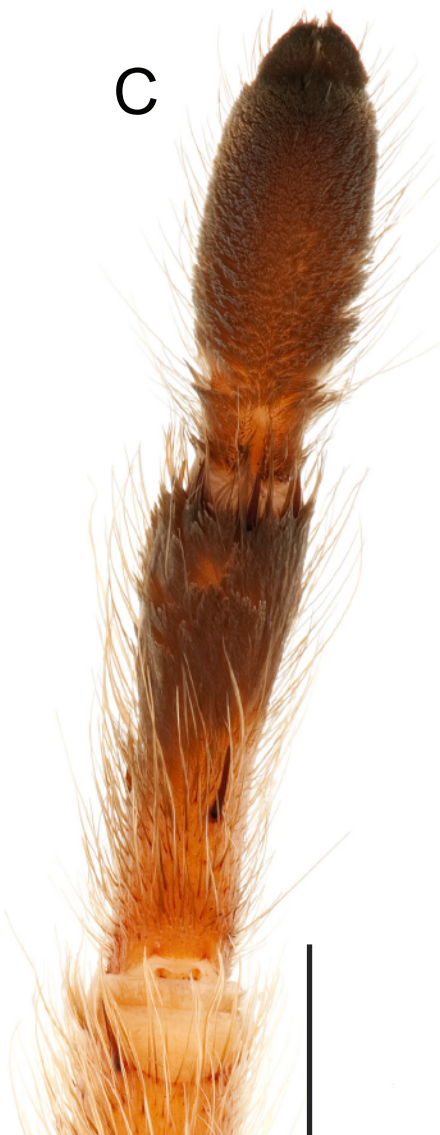

C

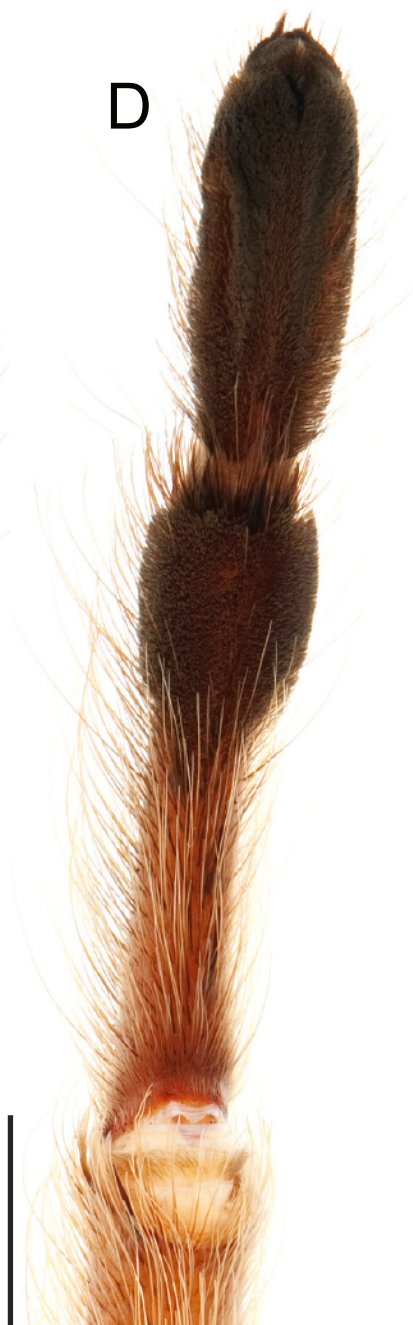

D

*Aphonopelma  
moderatum*

supplemental variation

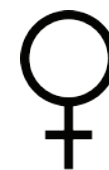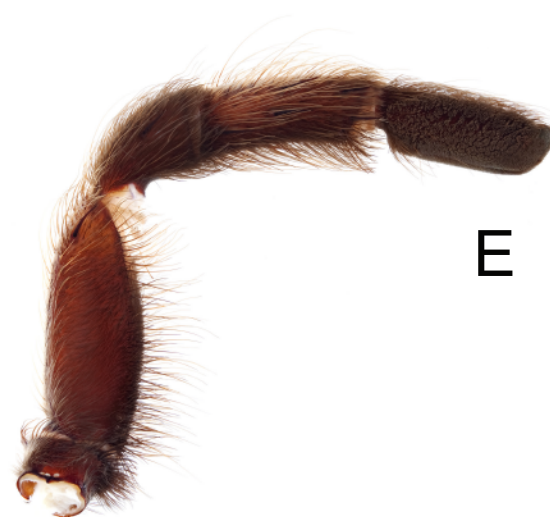

E

Supplement: Supplementary file 4

*Aphonopelma*  
*radinum*

HOLOTYPE

♂

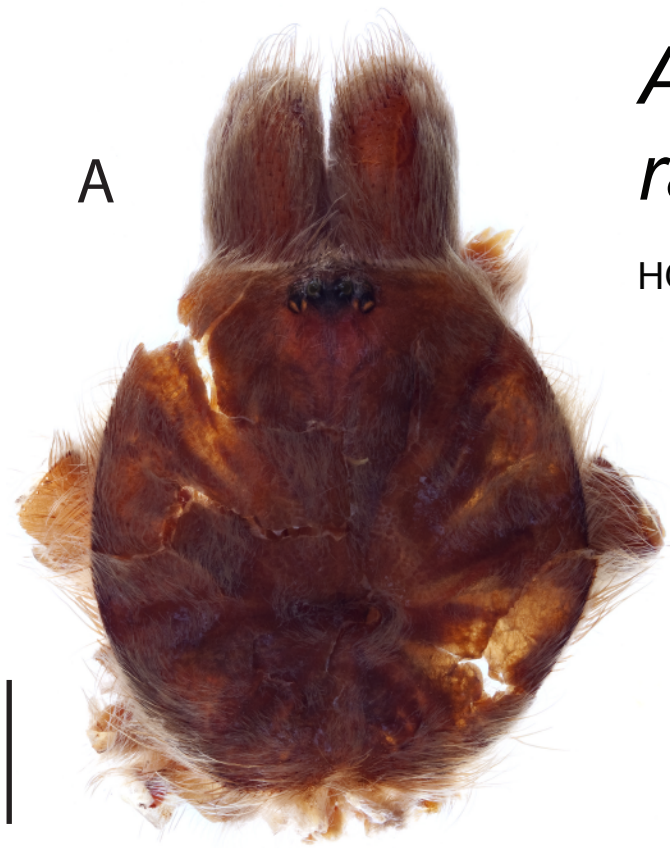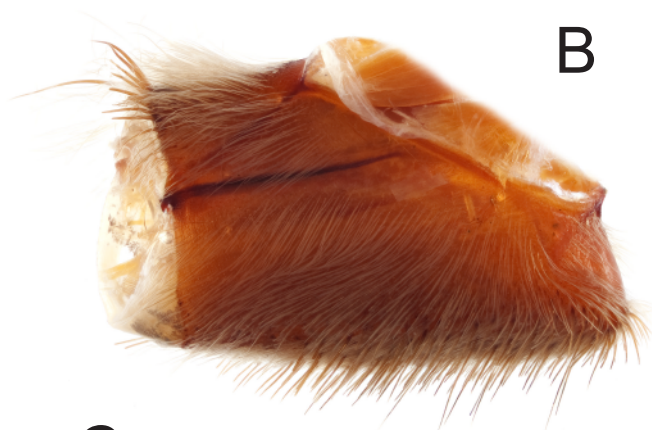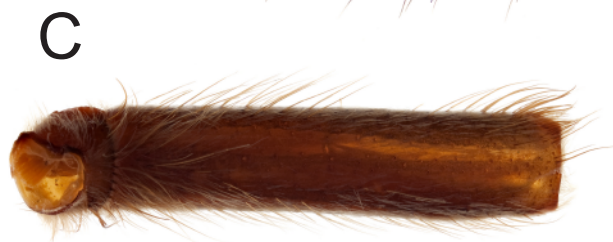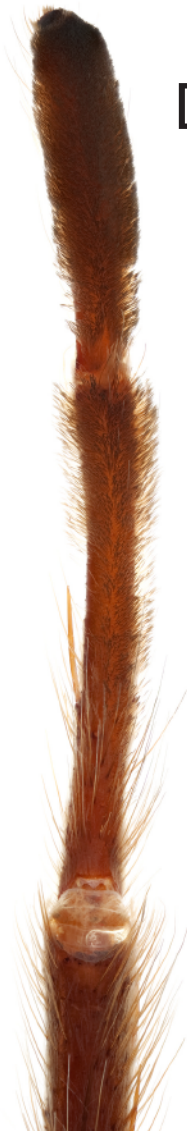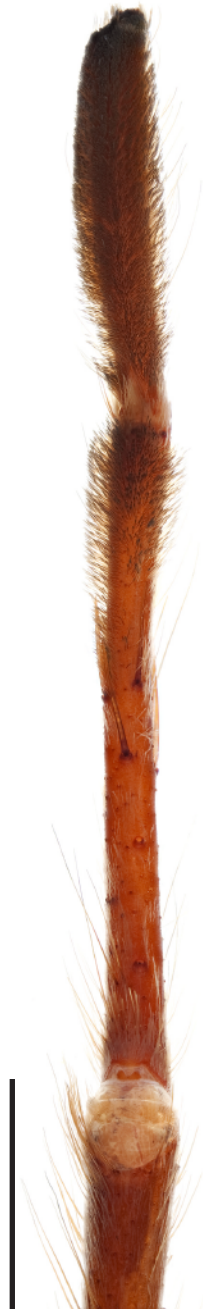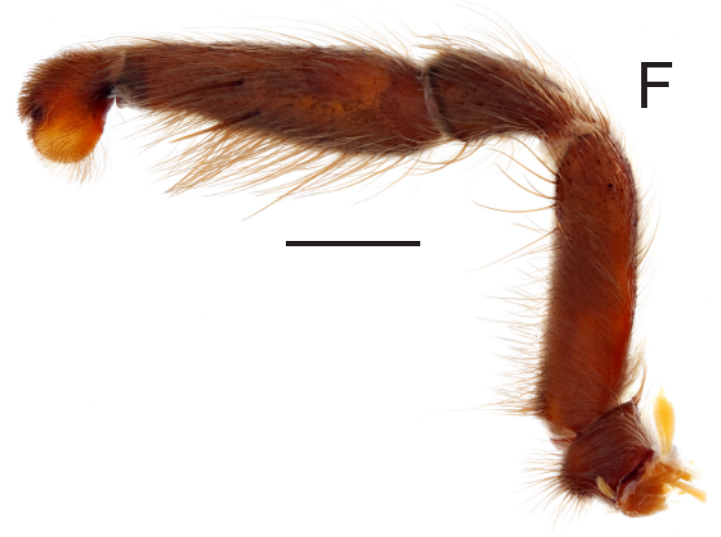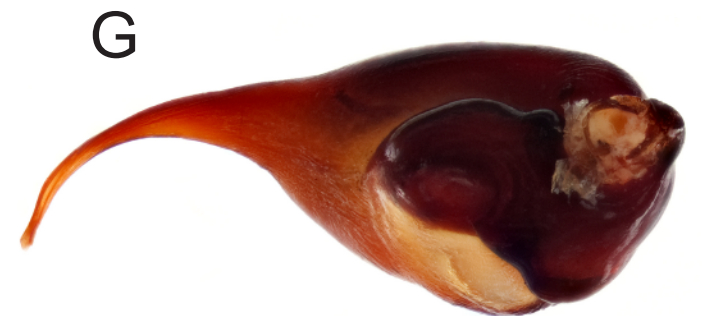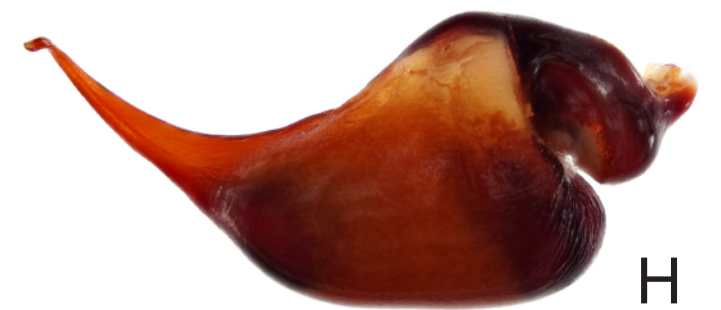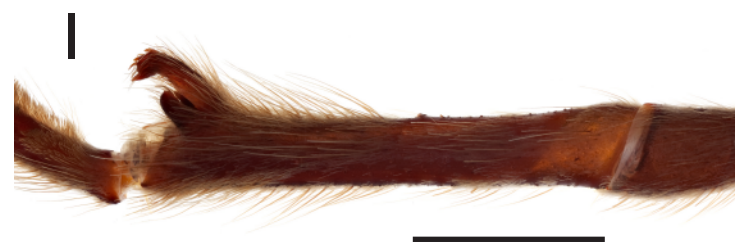

Supplement: Supplementary file 5

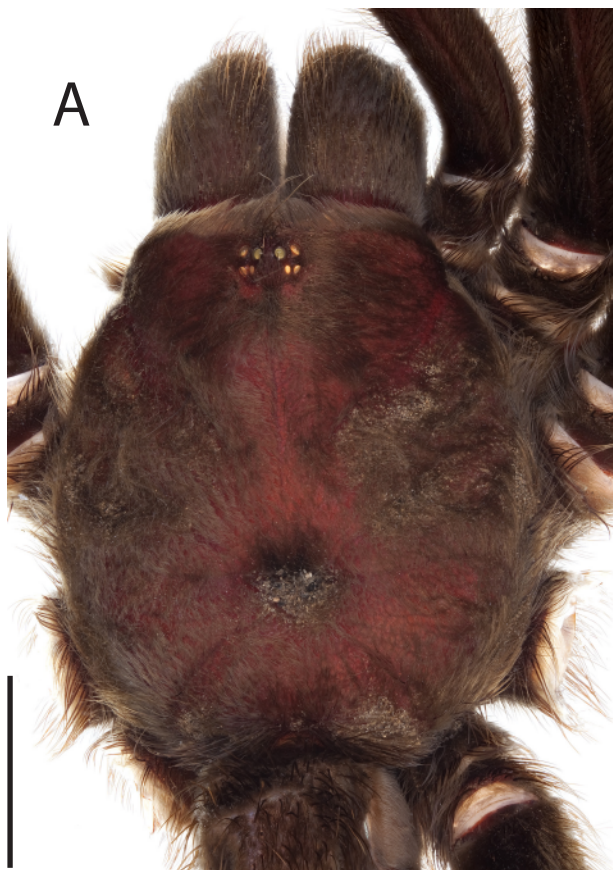

*Aphonopelma*  
*iodius*

♂

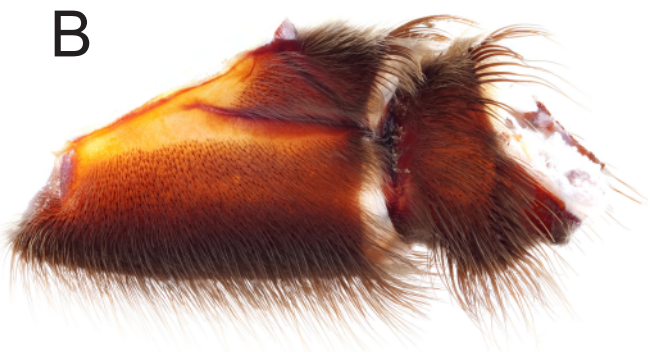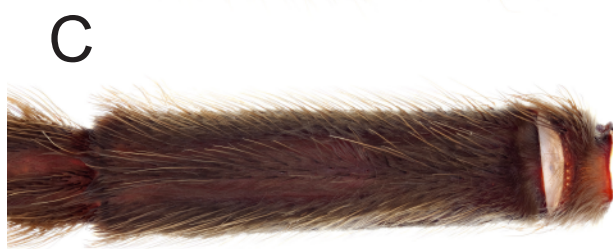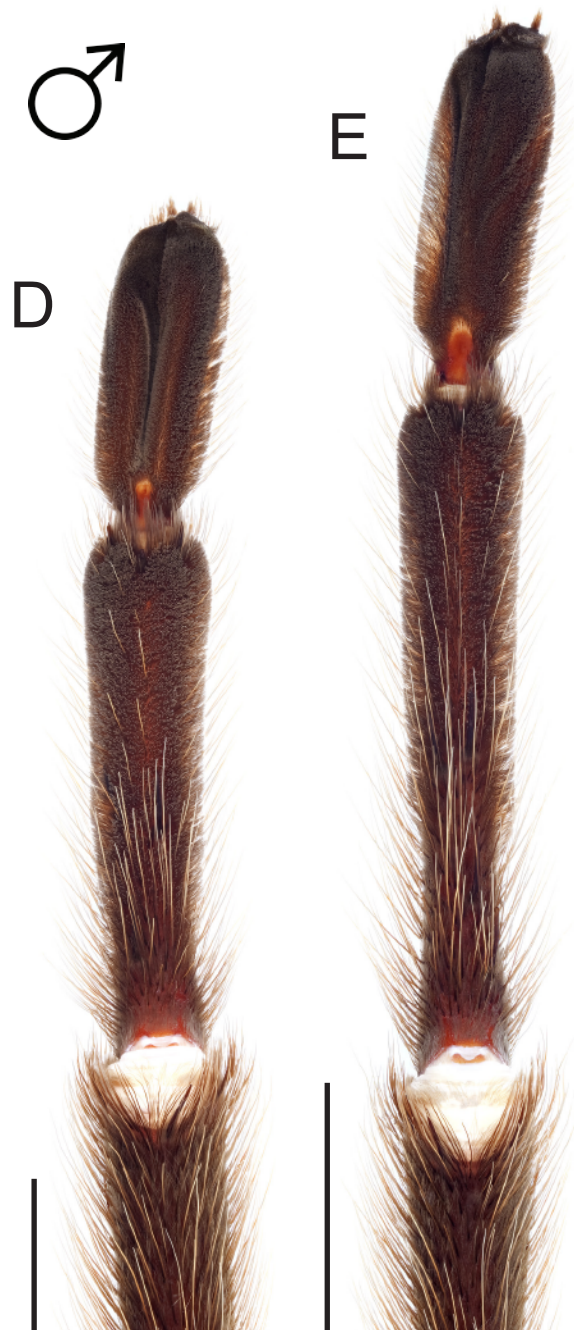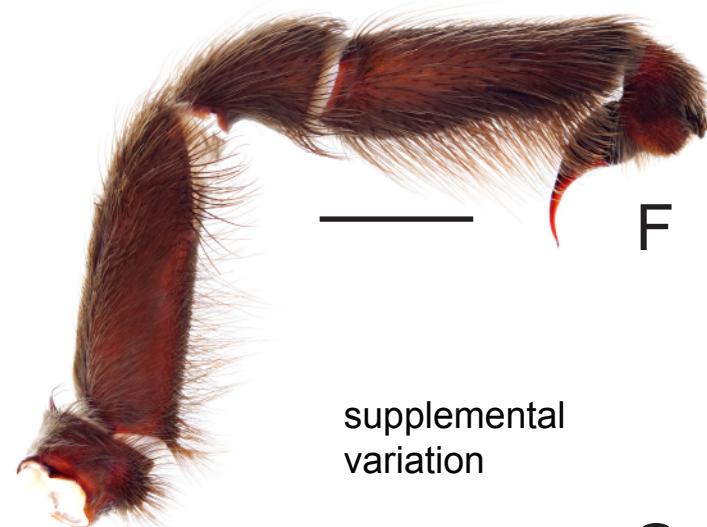

supplemental  
variation

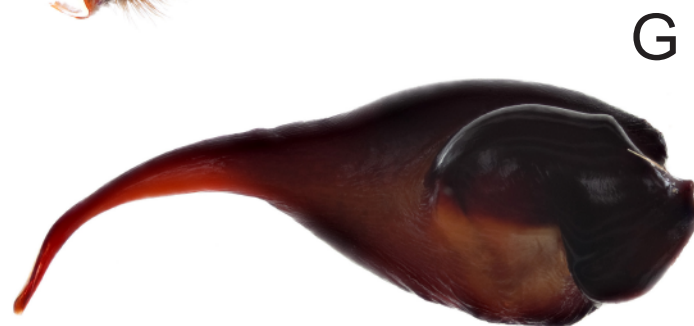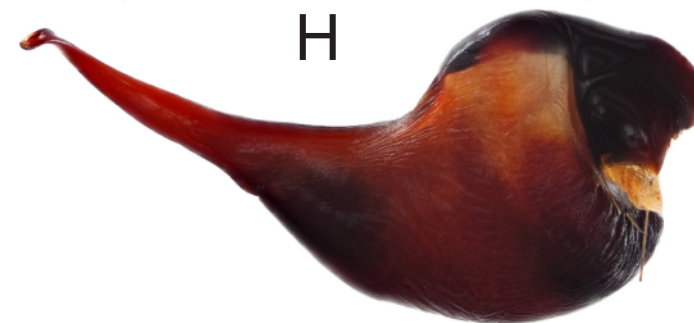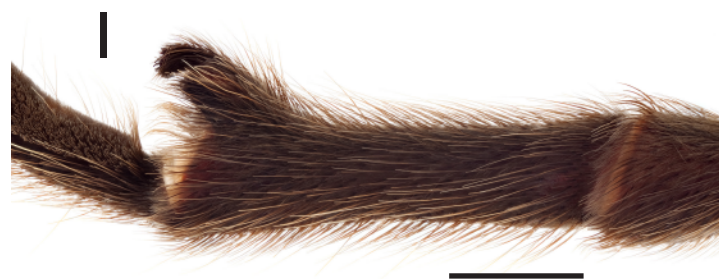

Supplement: Supplementary file 6

*Aphonopelma  
peloncillo*

♂

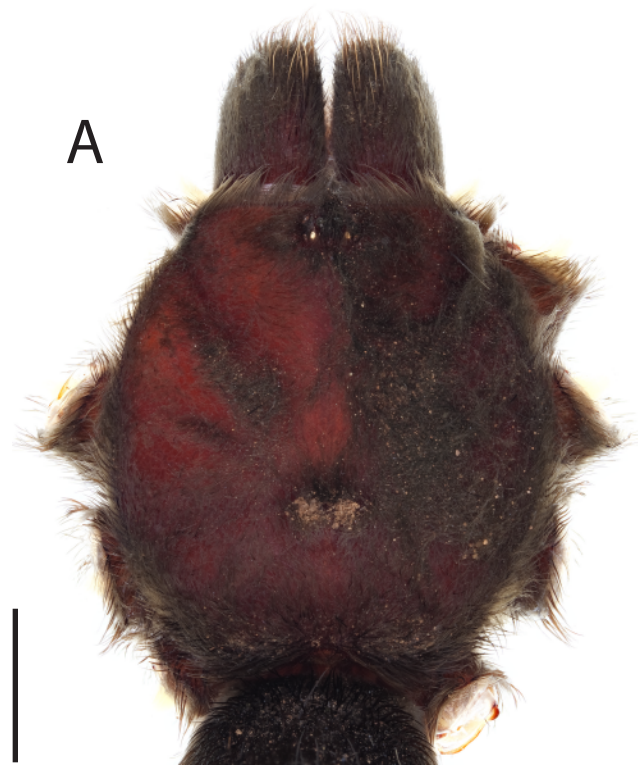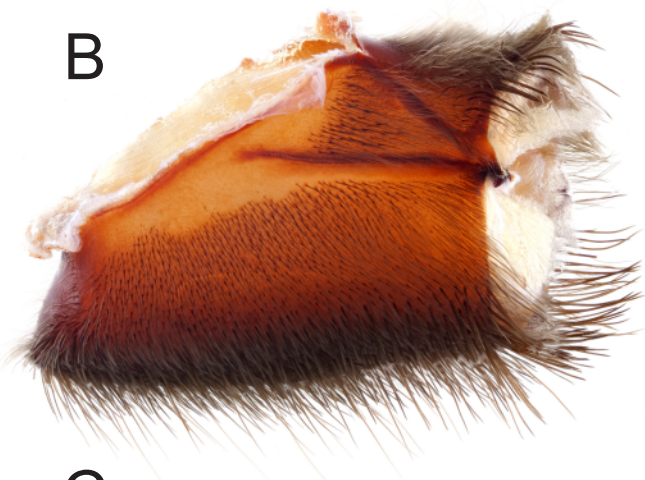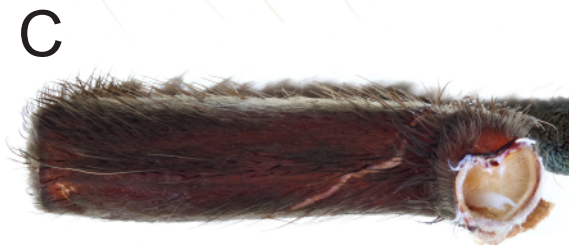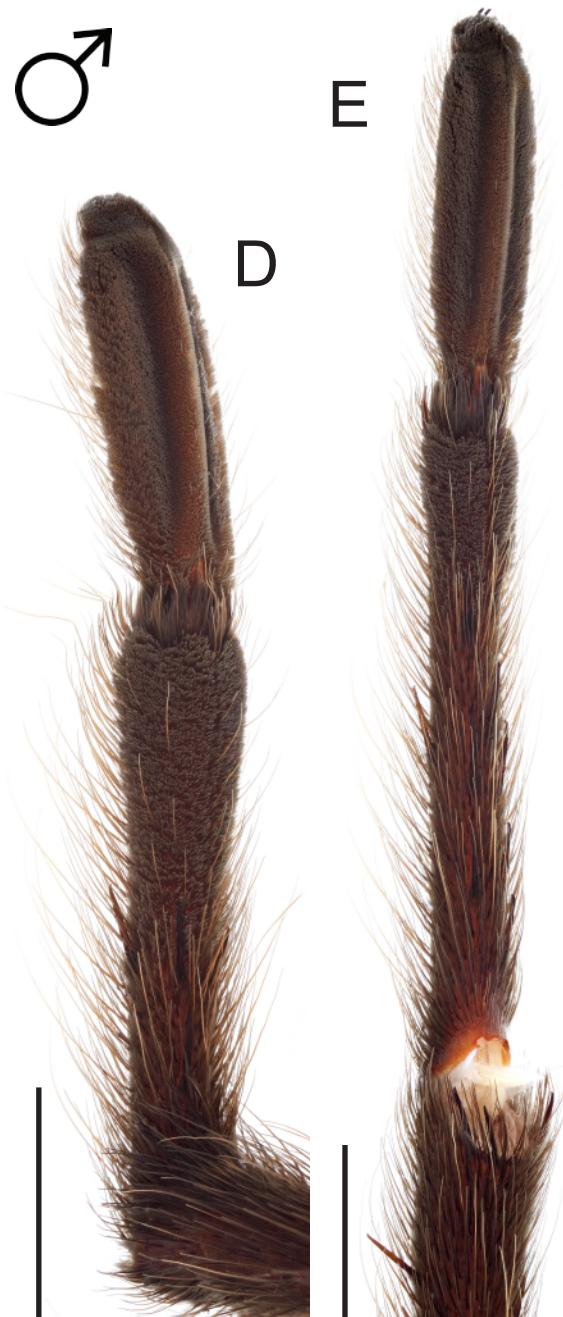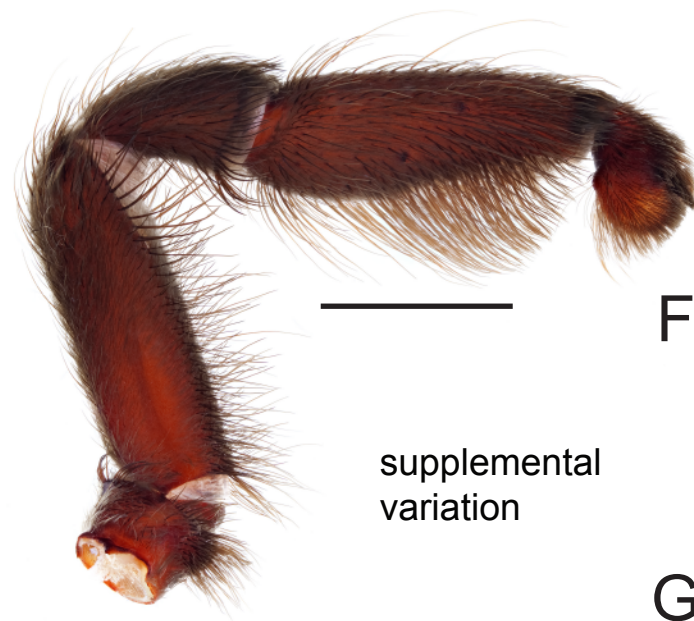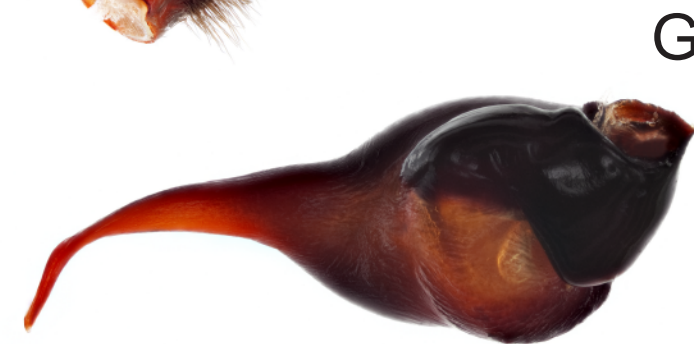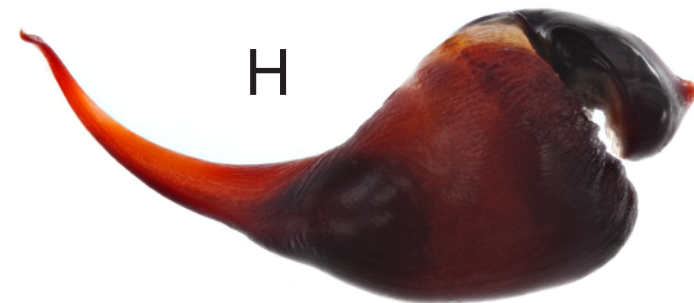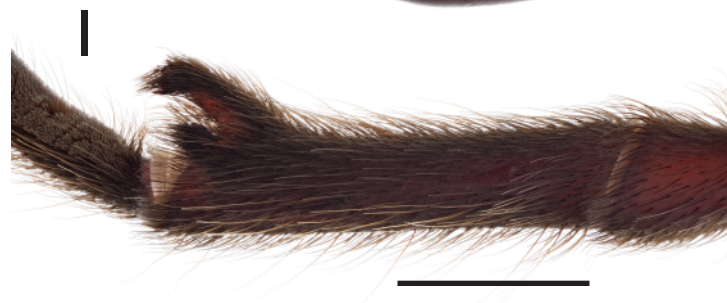

Supplement: Supplementary file 7

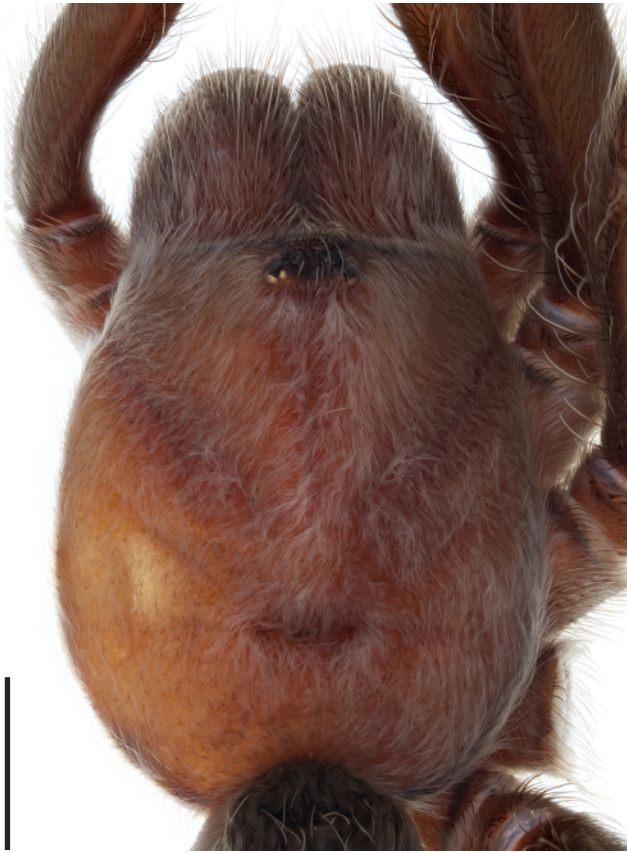

A

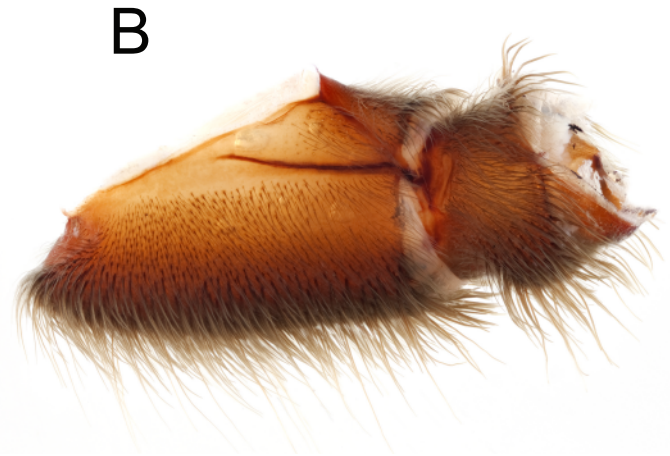

B

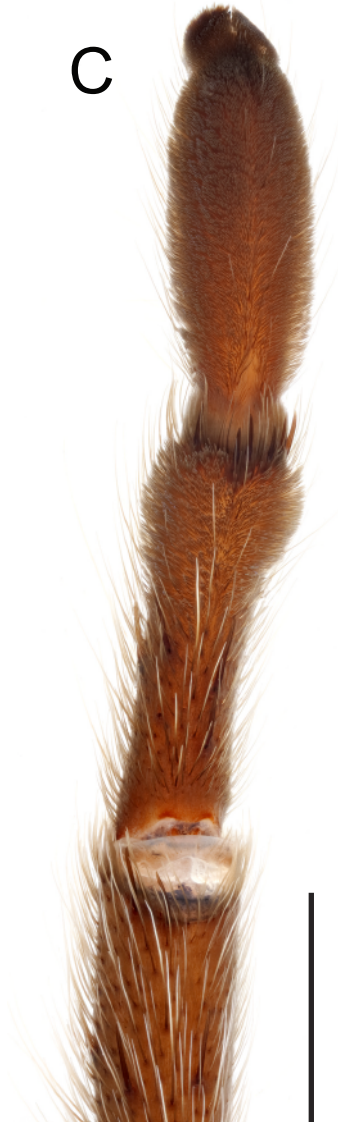

C

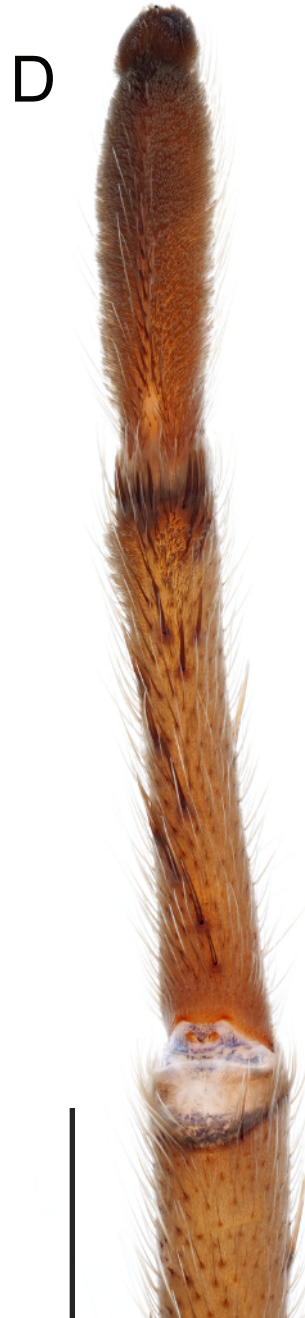

D

*Aphonopelma*  
*mareki*

supplemental variation

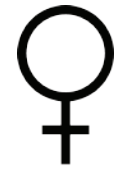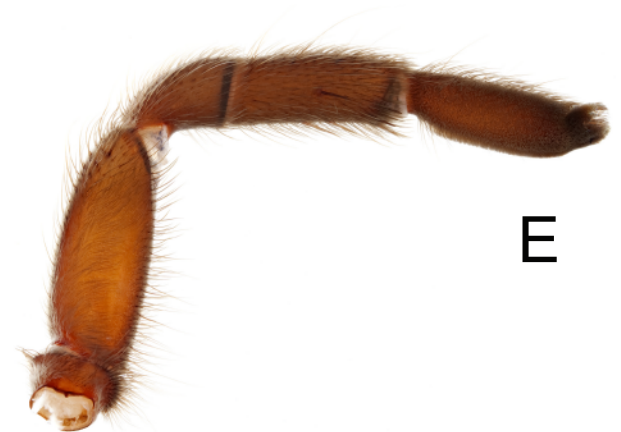

E

Supplement: Supplementary file 8

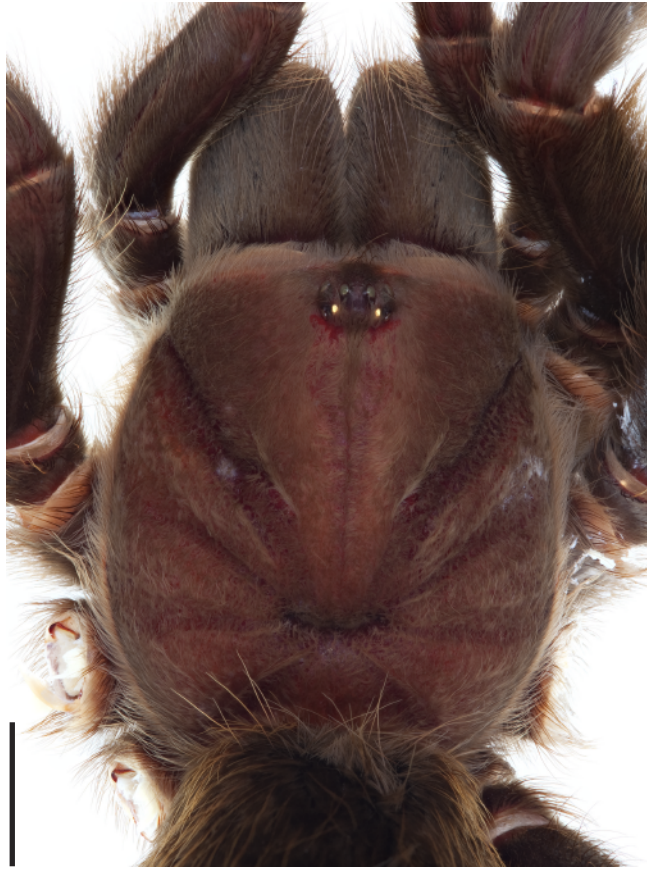

A

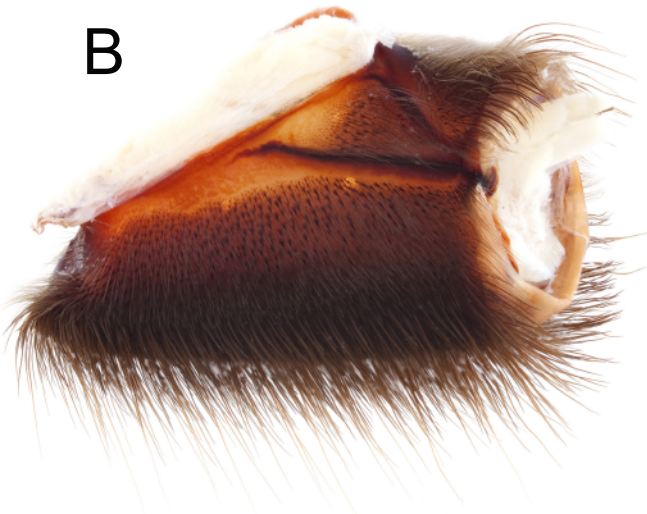

B

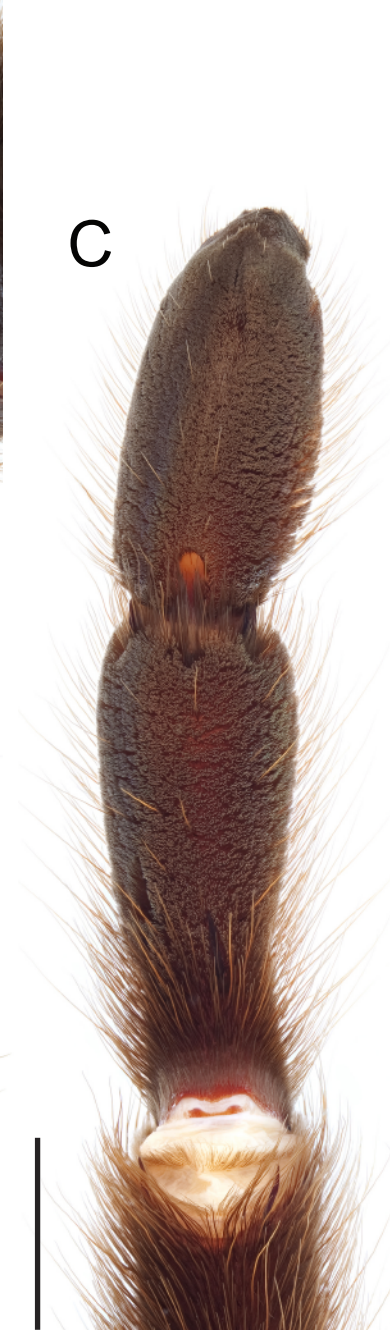

C

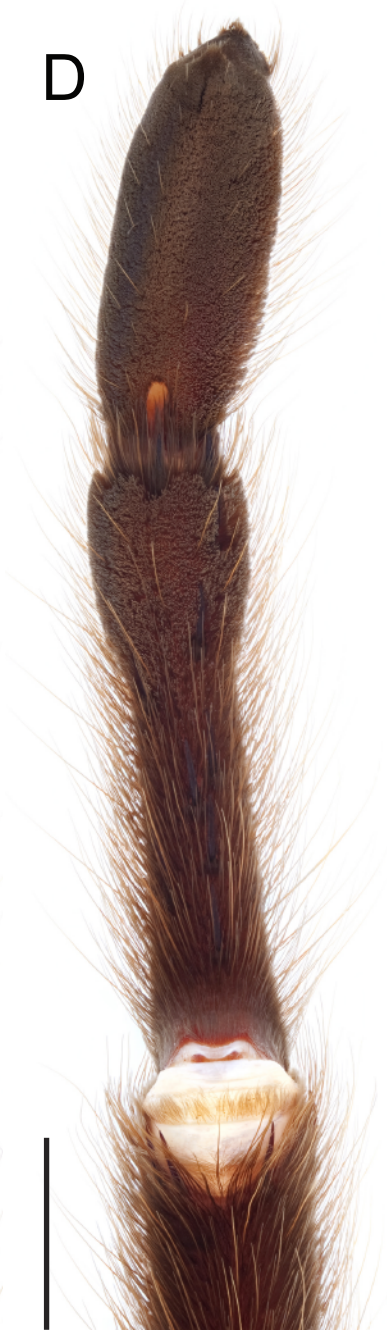

D

*Aphonopelma*  
*anax*

supplemental variation

♀

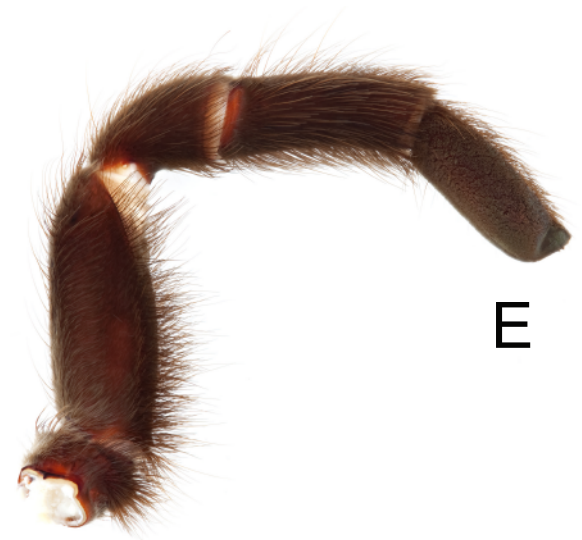

E

Supplement: Supplementary file 9

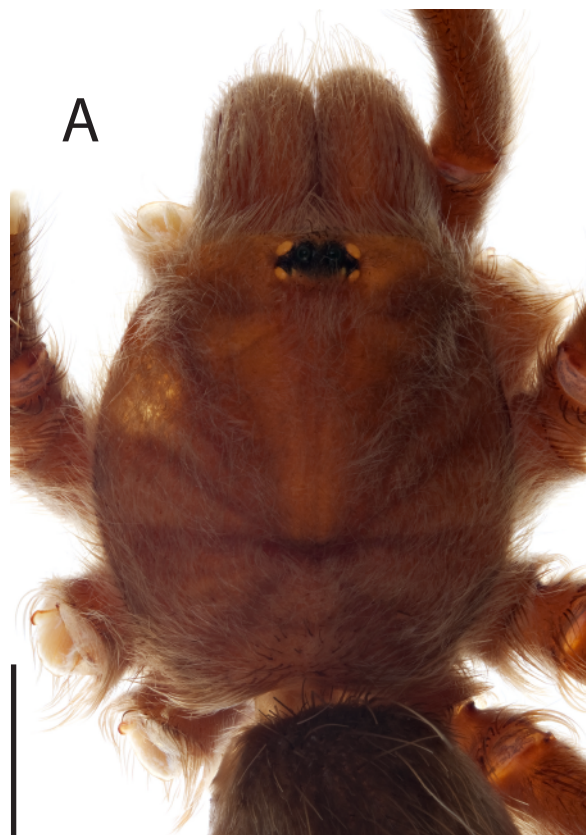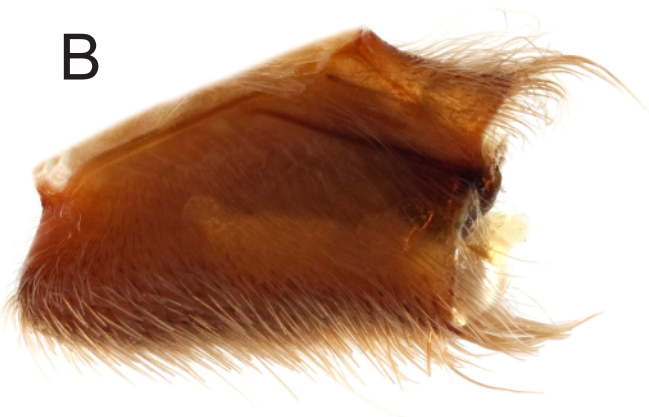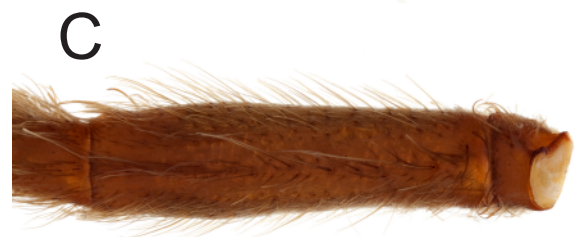

*Aphonopelma*  
*saguaro*

♂

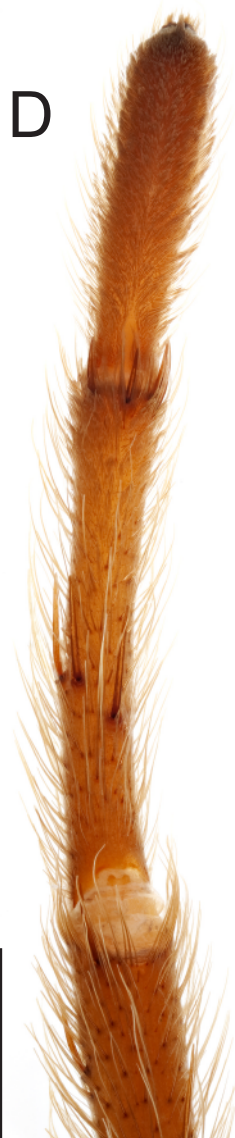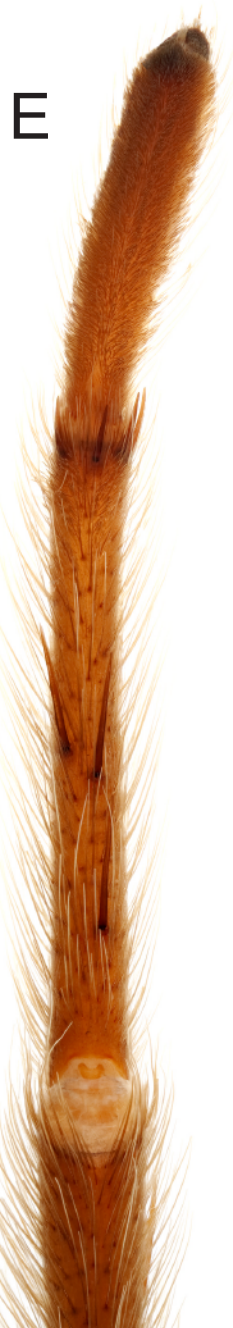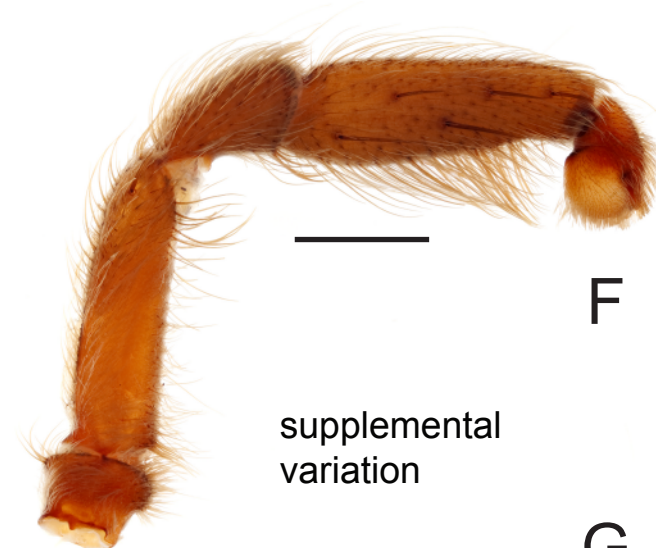

F

supplemental  
variation

G

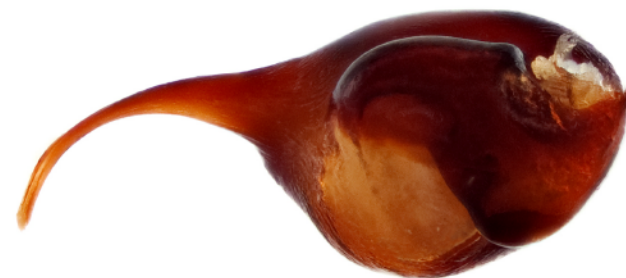

H

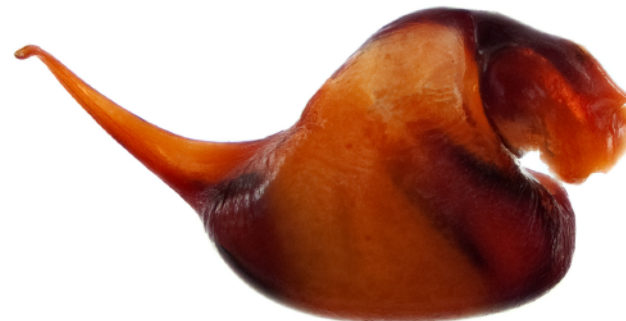

I

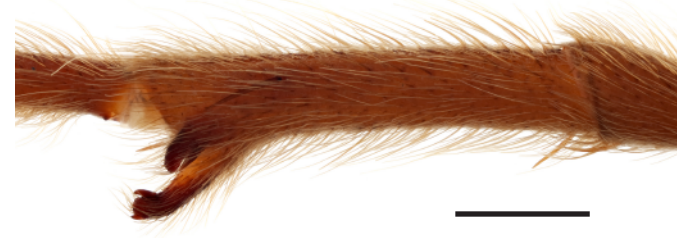

Supplement: Supplementary file 10

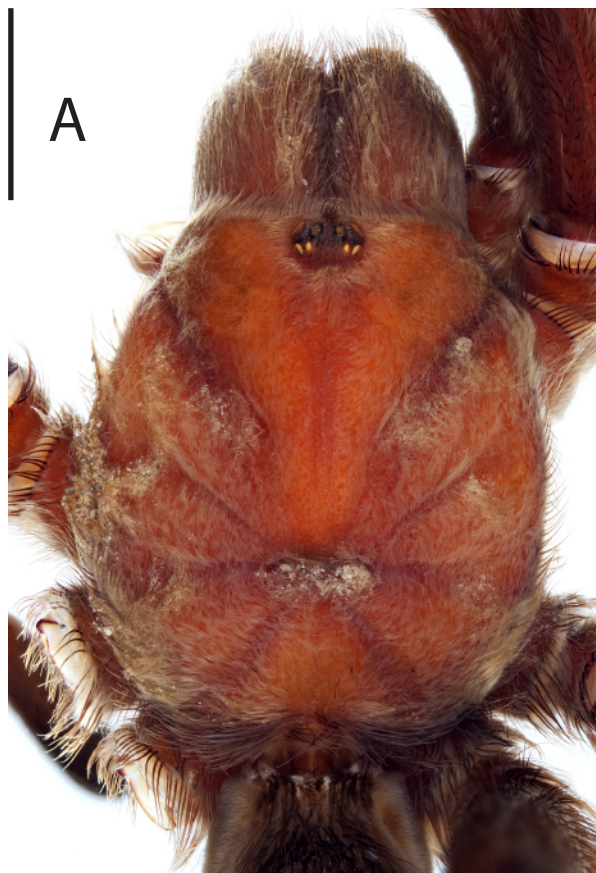

*Aphonopelma*  
*iodius*

♂

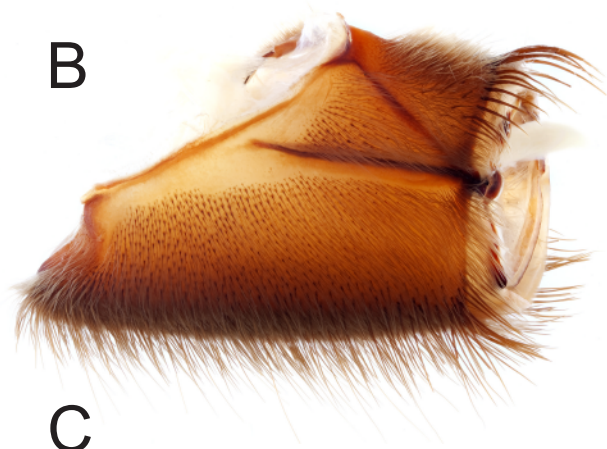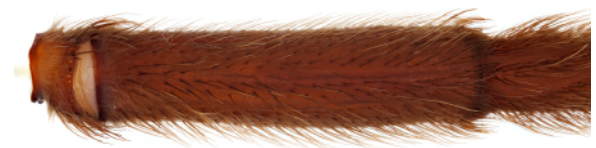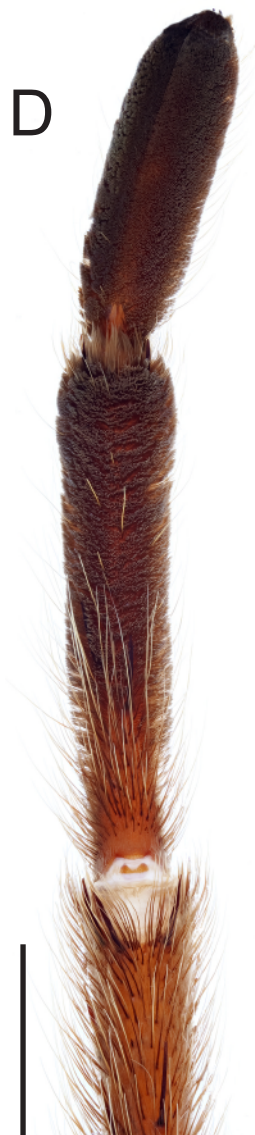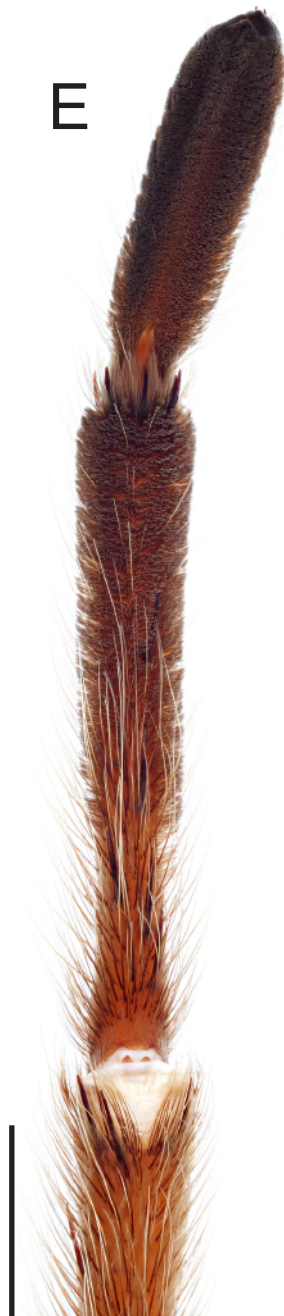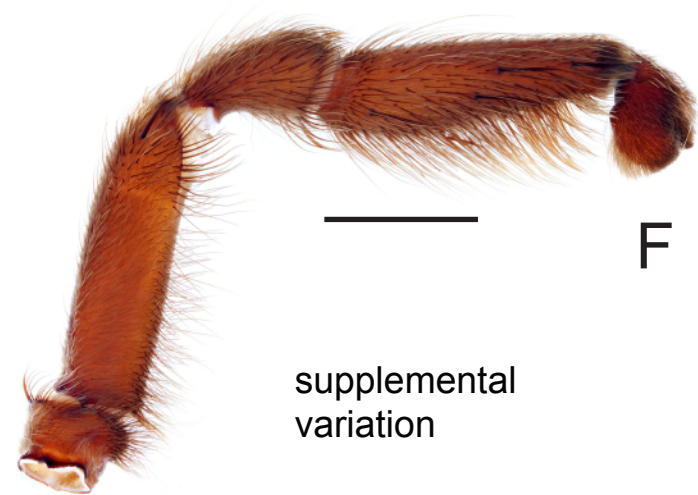

supplemental  
variation

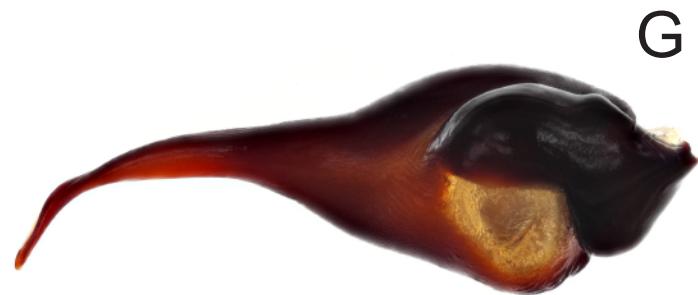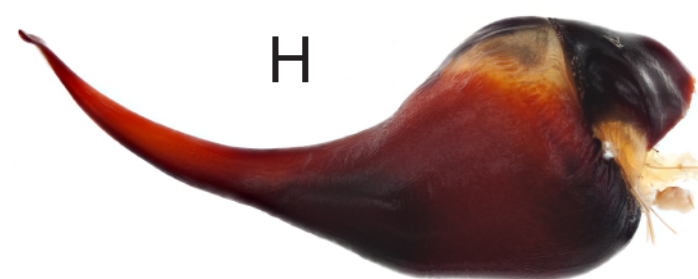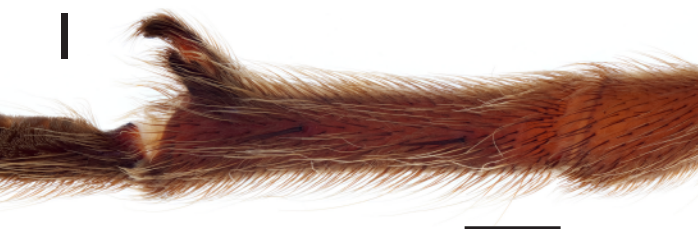

Supplement: Supplementary file 11

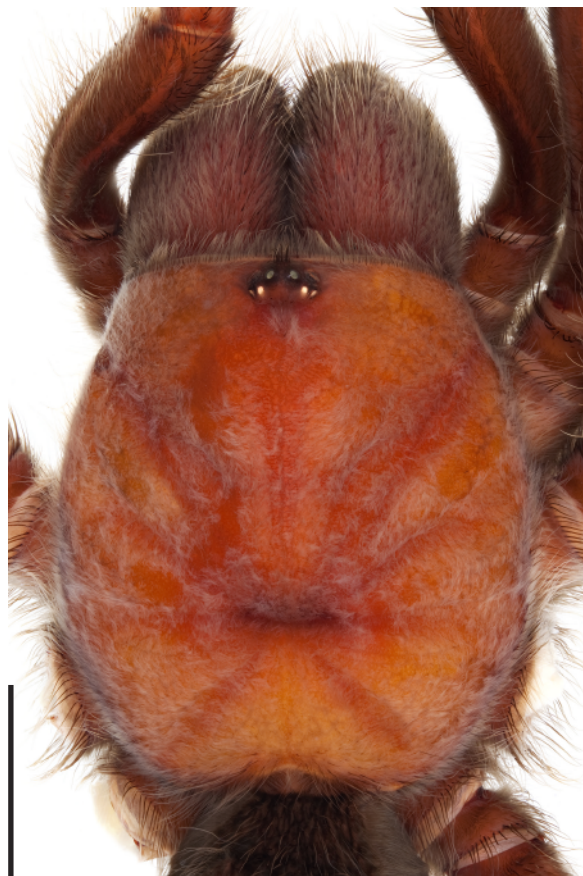

A

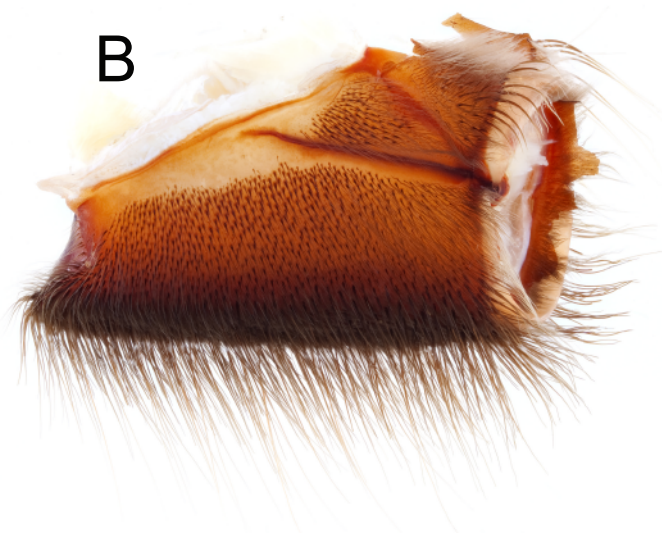

B

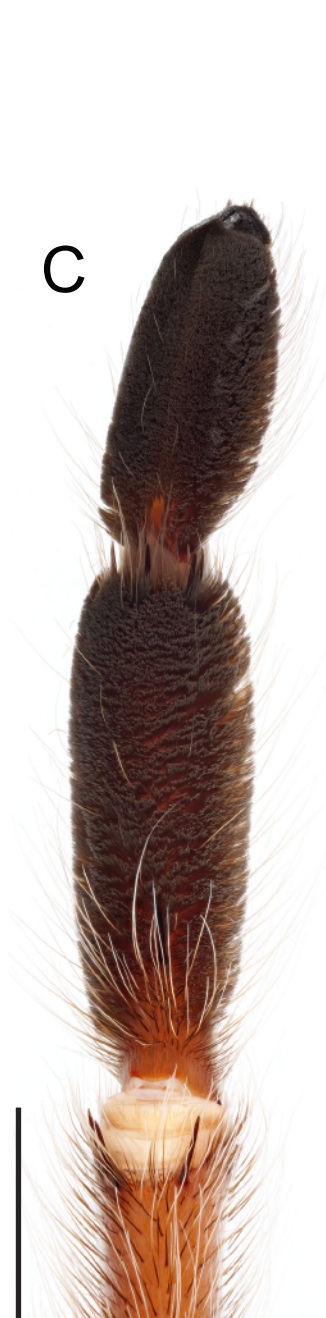

C

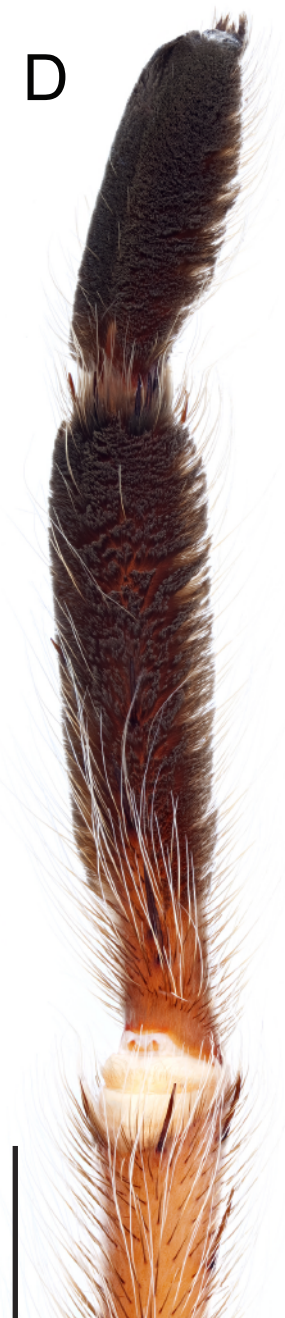

D

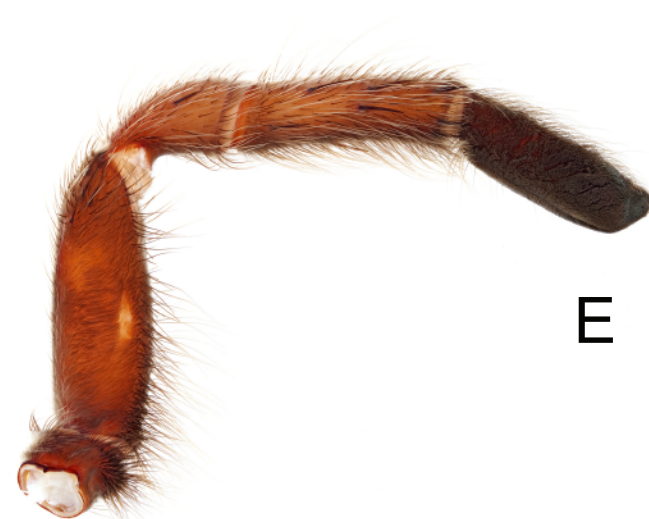

E

*Aphonopelma*  
*iodius*

supplemental variation

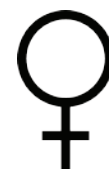

Supplement: Supplementary file 12

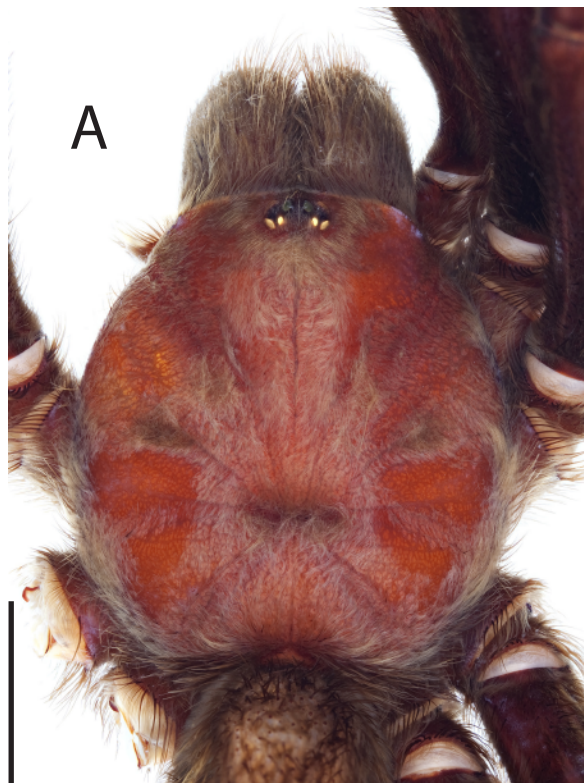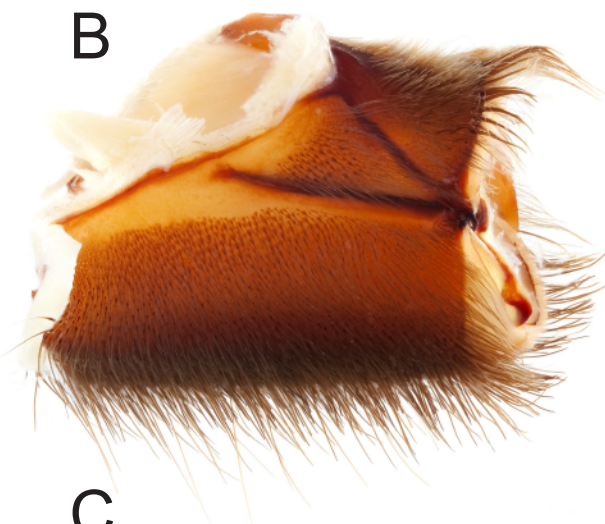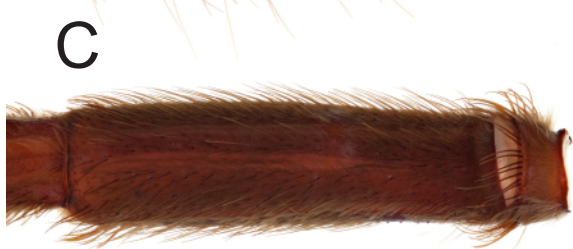

*Aphonopelma  
chalcodes*

♂

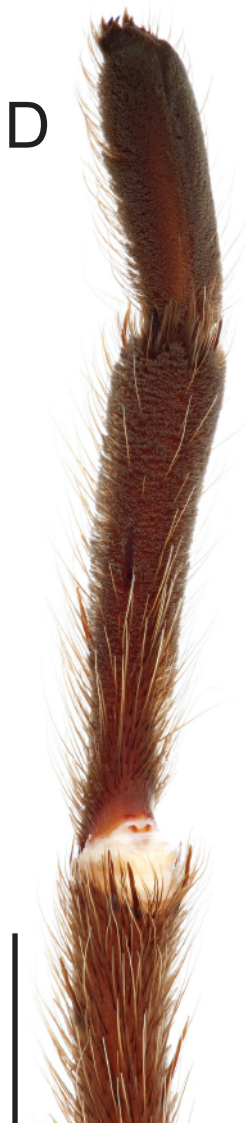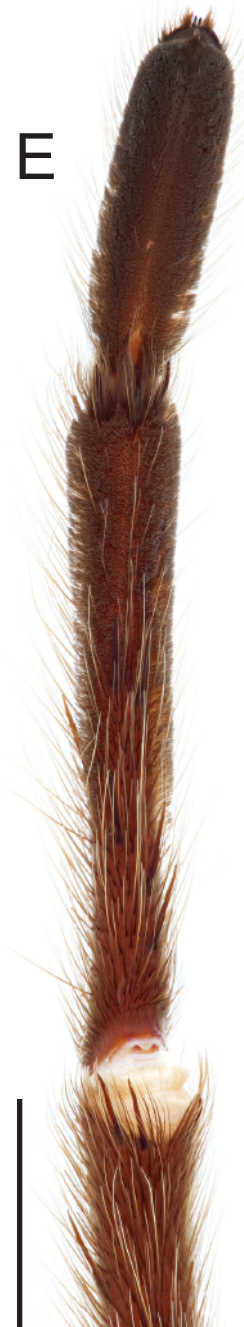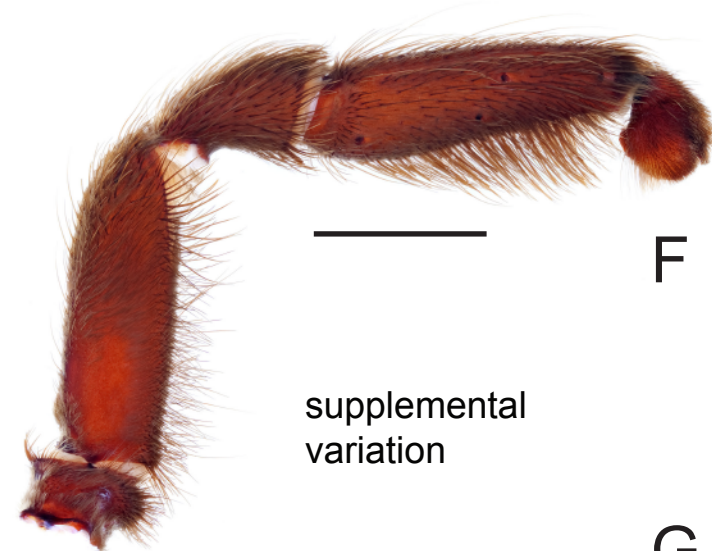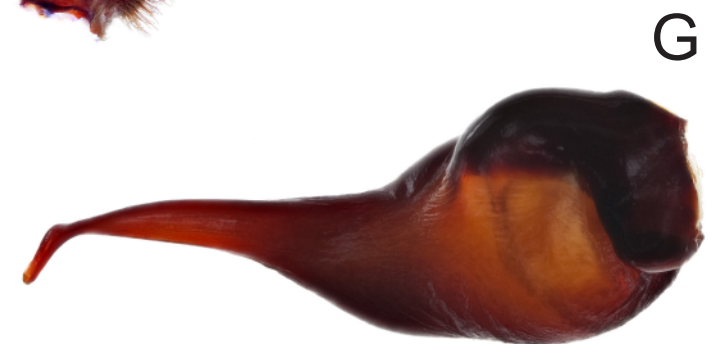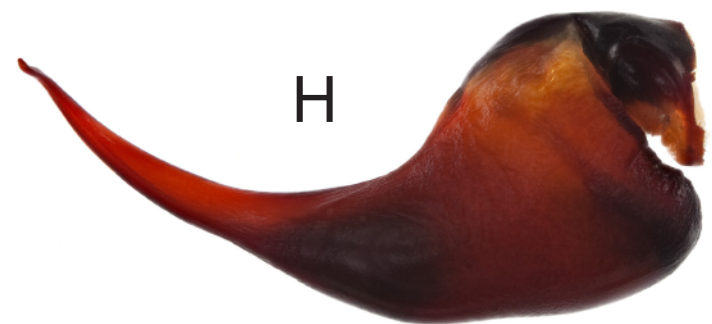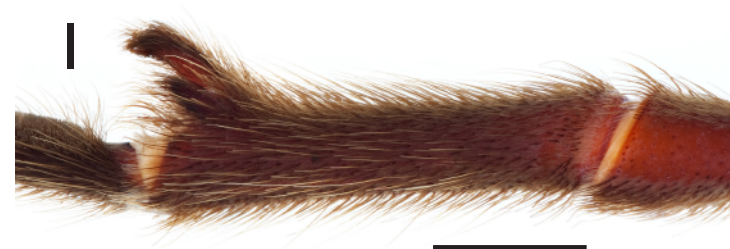

Supplement: Supplementary file 13

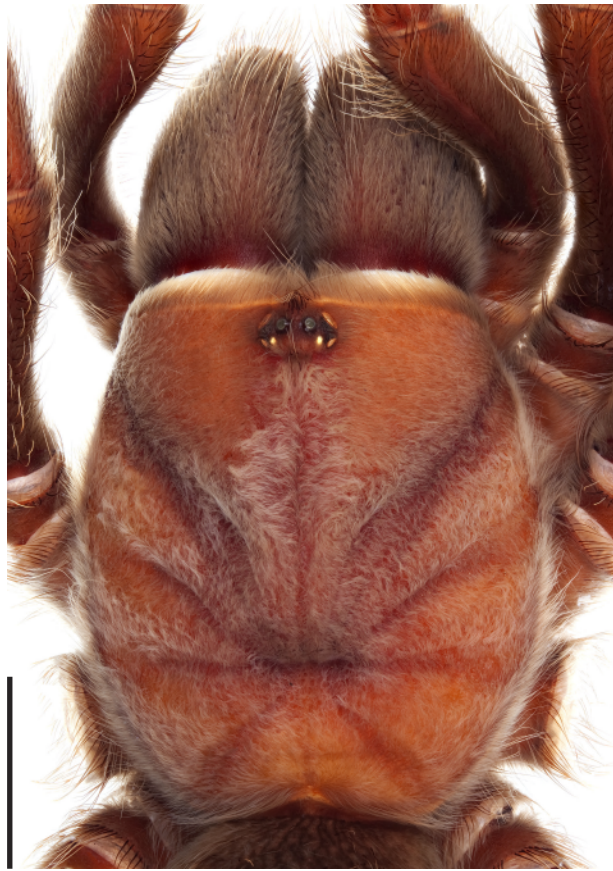

A

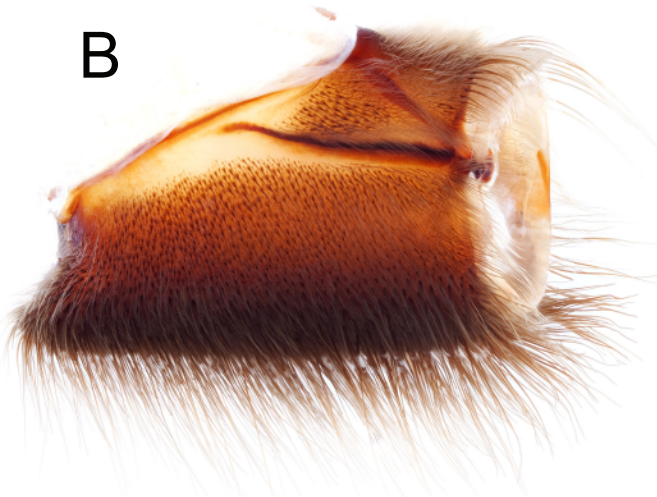

B

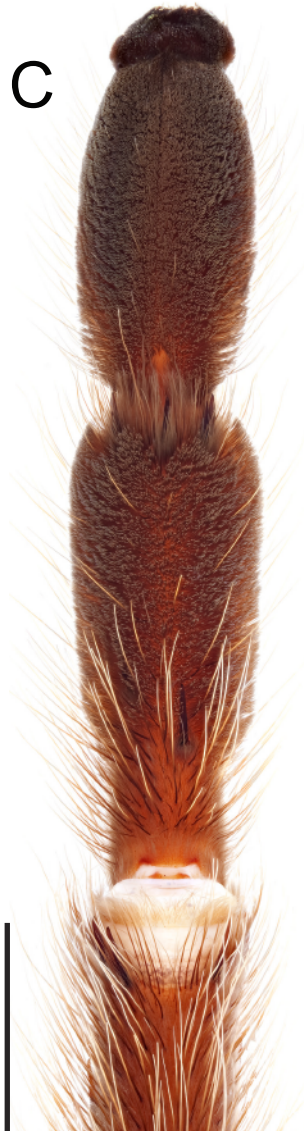

C

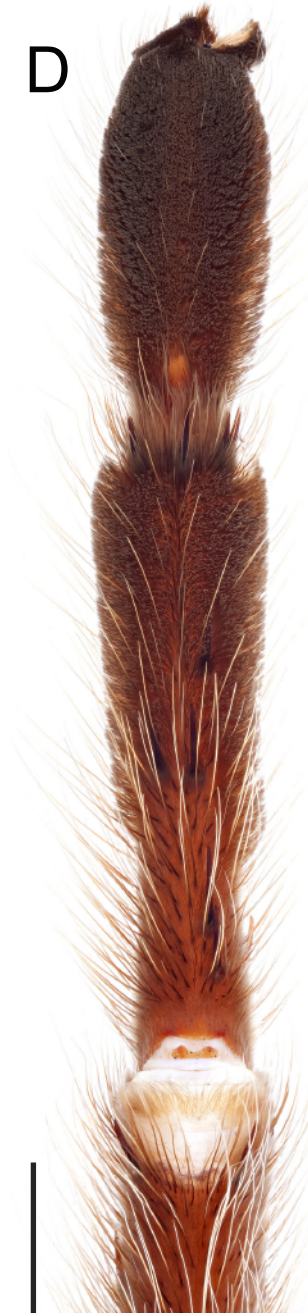

D

*Aphonopelma*  
*iodius*

supplemental variation

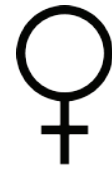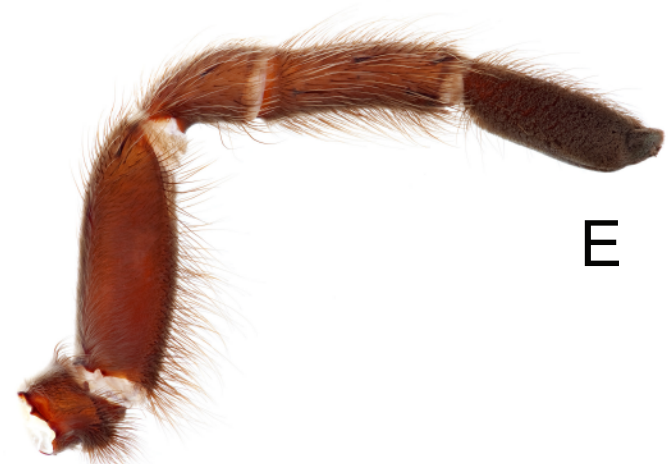

E

Supplement: Supplementary file 14

*Aphonopelma*  
*hentzi*

♂

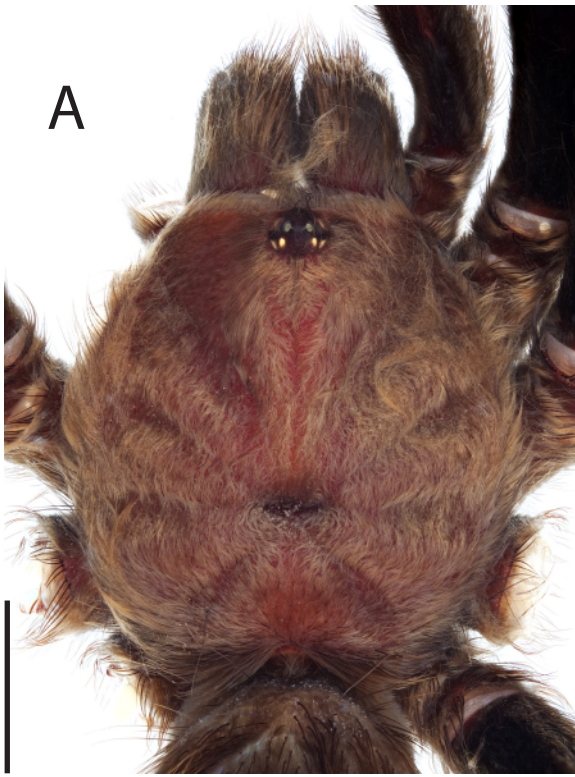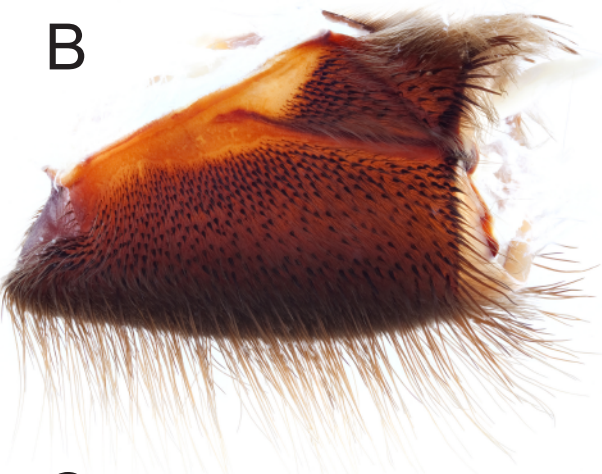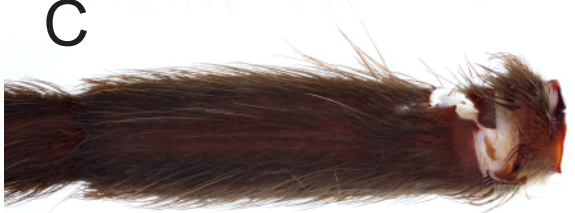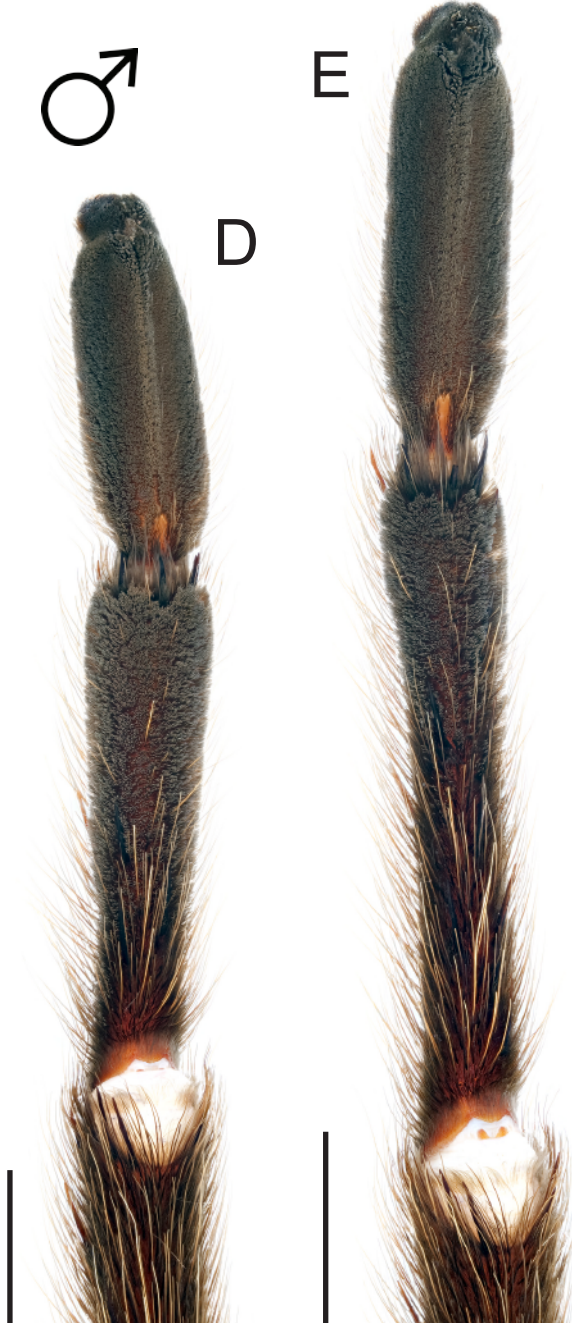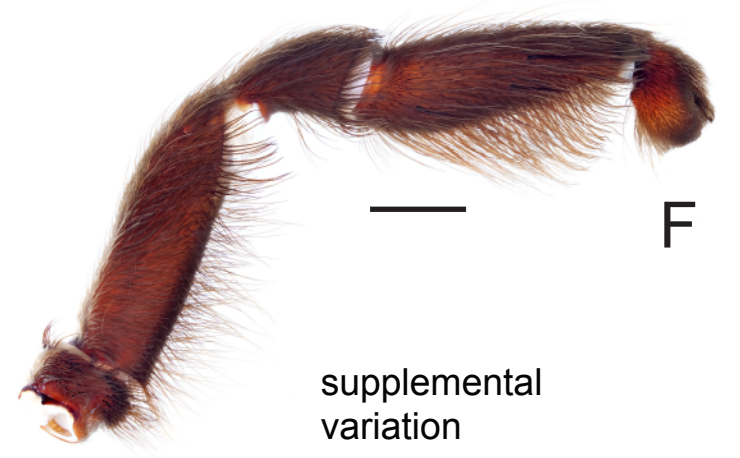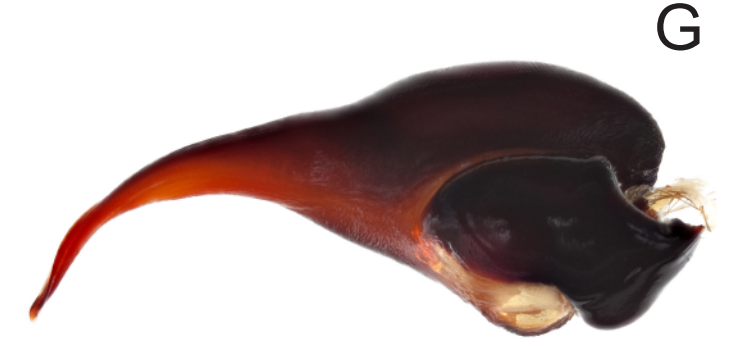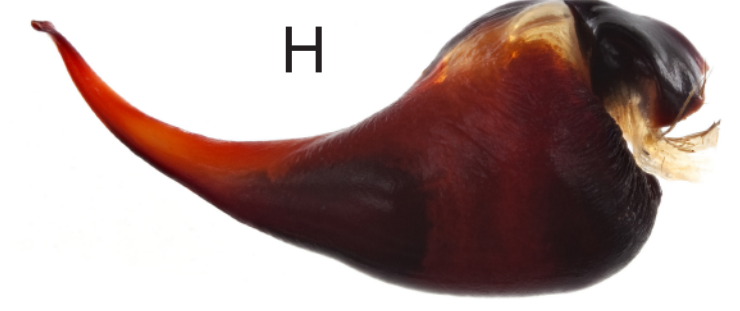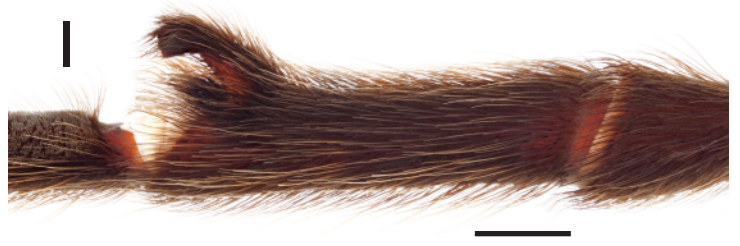

Supplement: Supplementary file 15

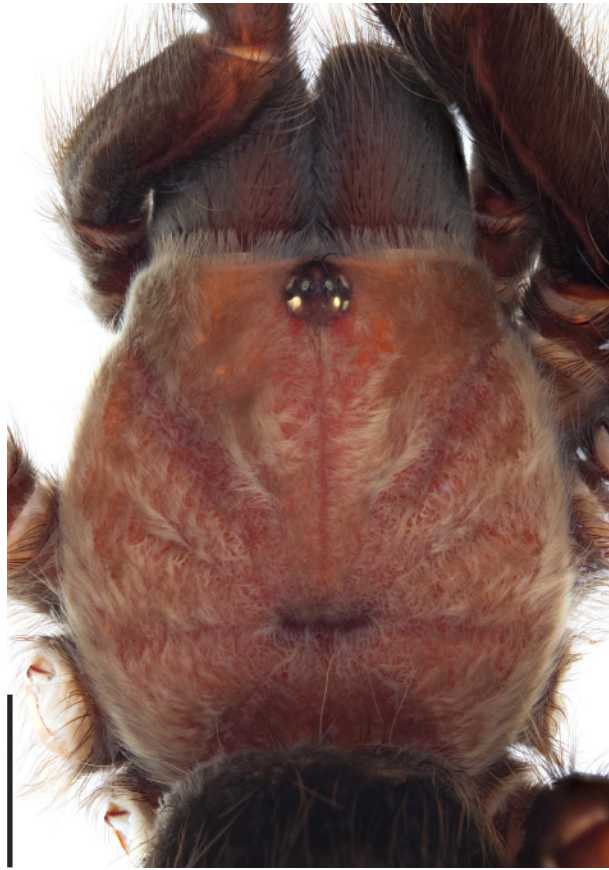

A

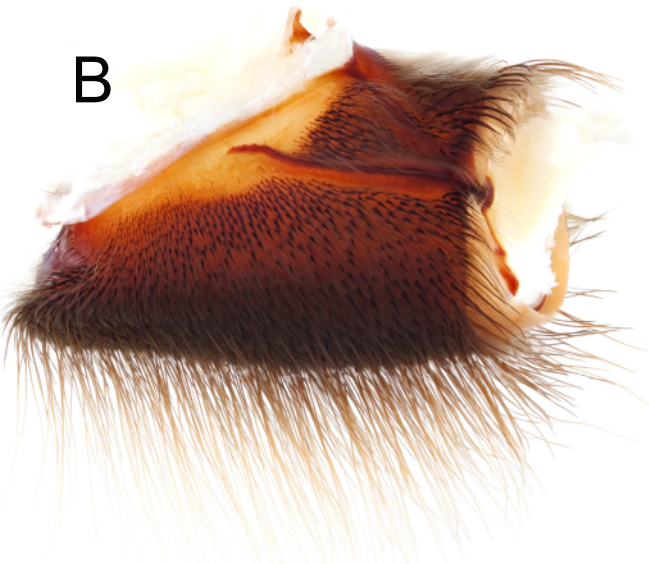

B

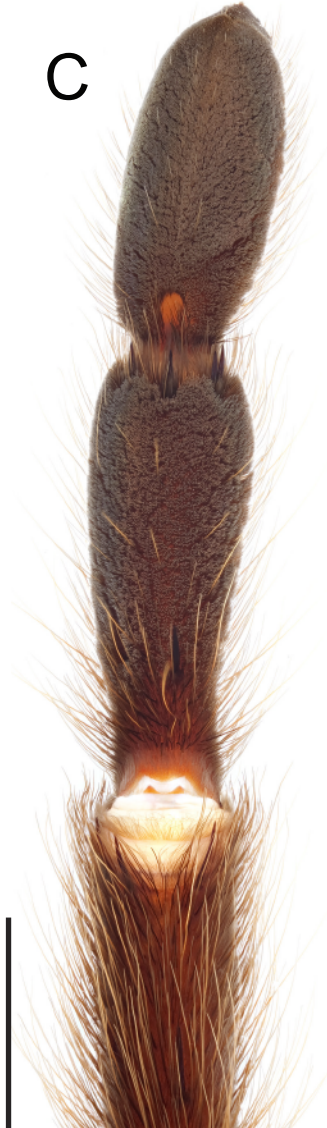

C

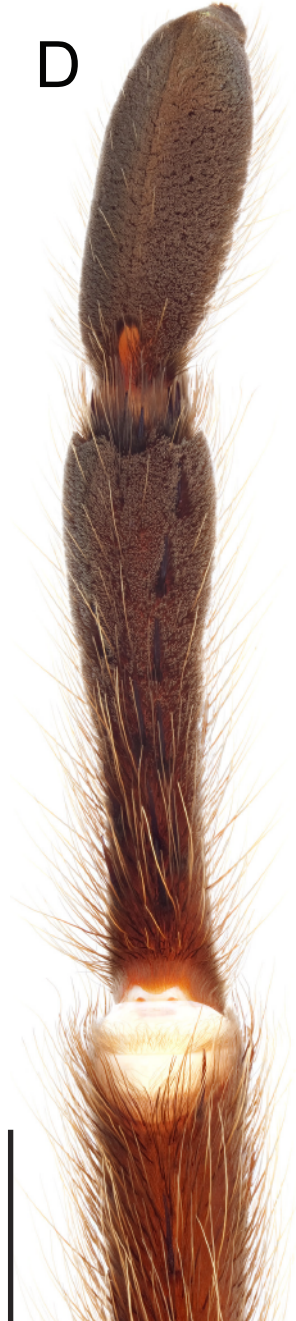

D

*Aphonopelma*  
*hentzi*

supplemental variation

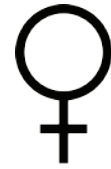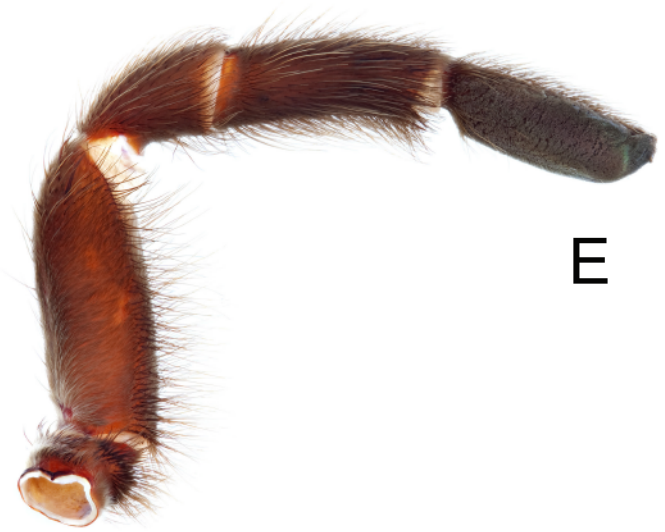

E

Supplement: Supplementary file 16

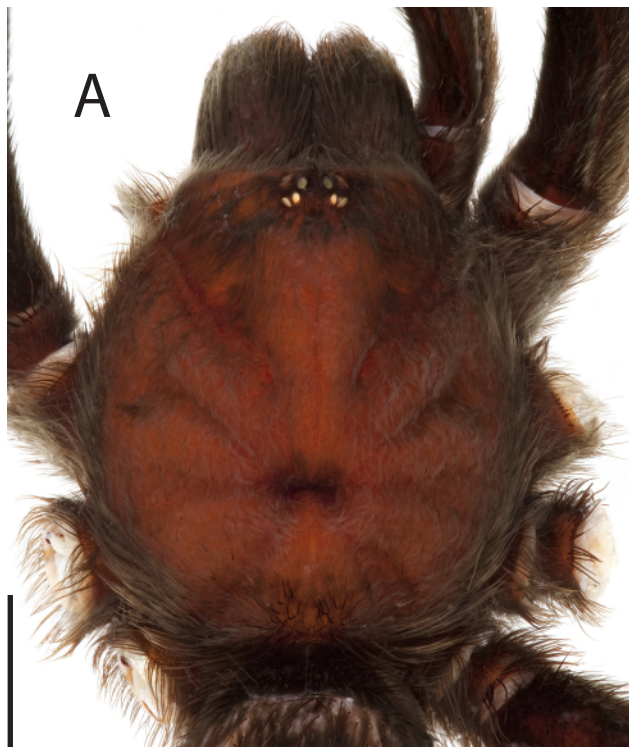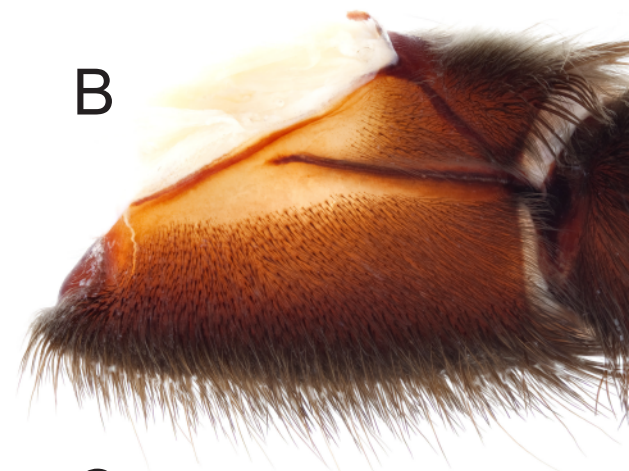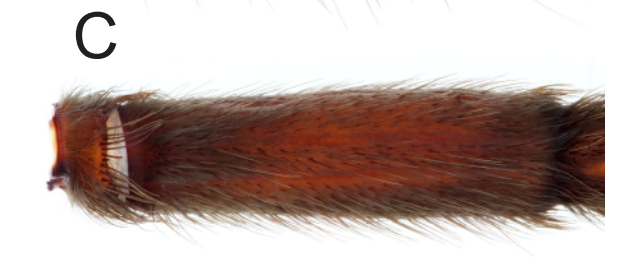

*Aphonopelma  
moderatum*

♂

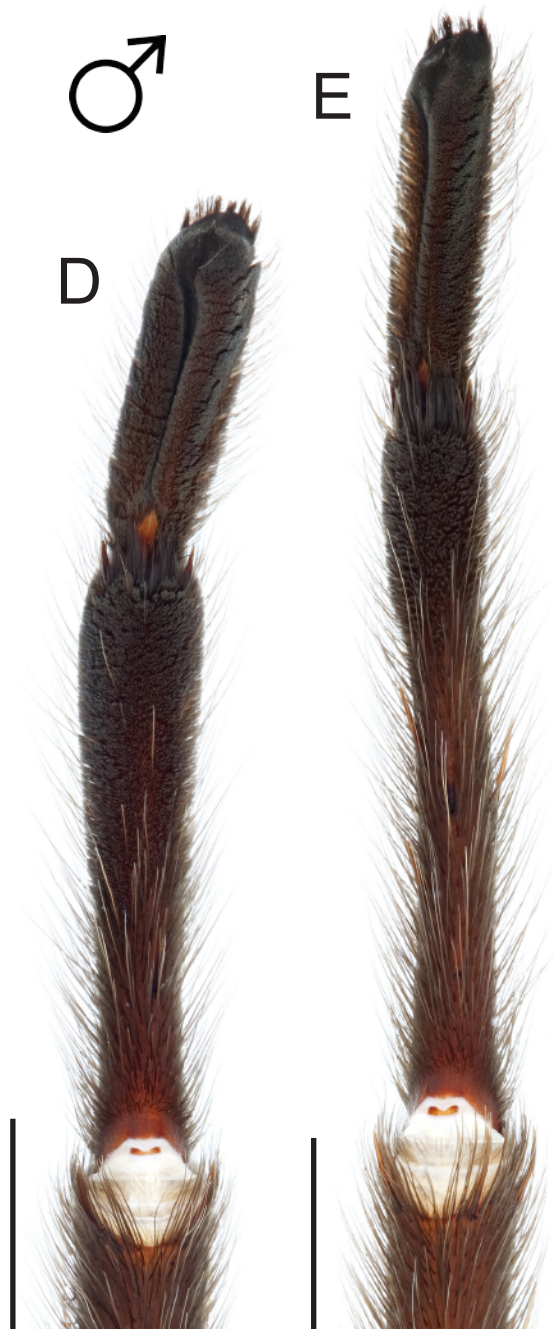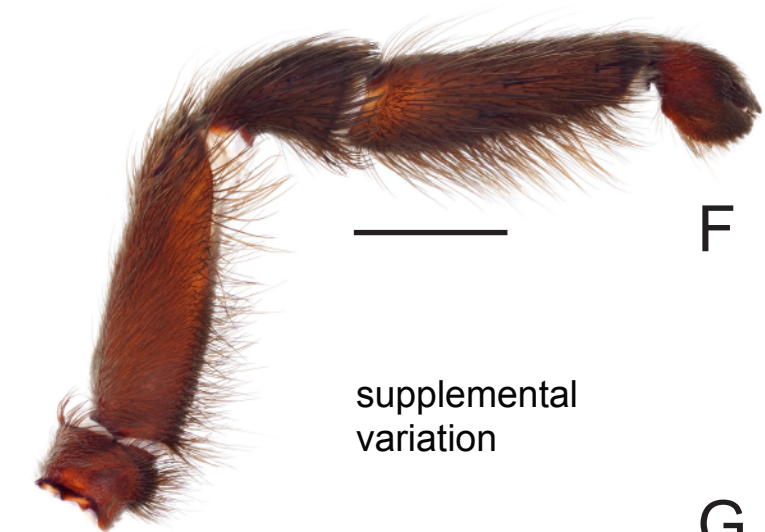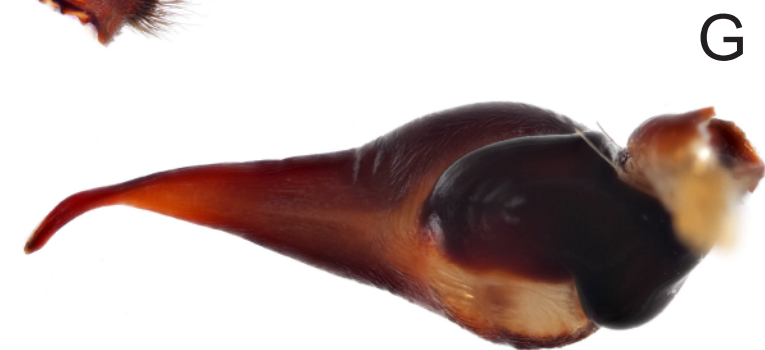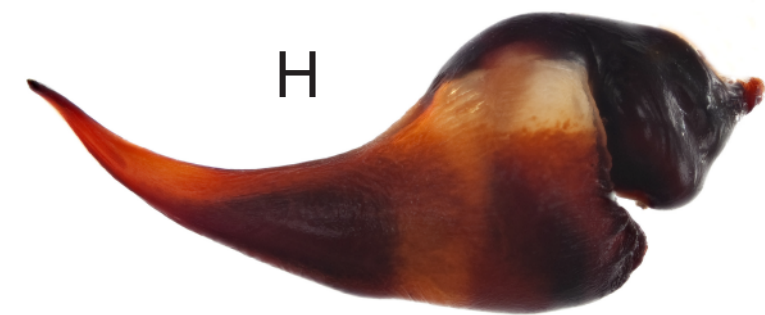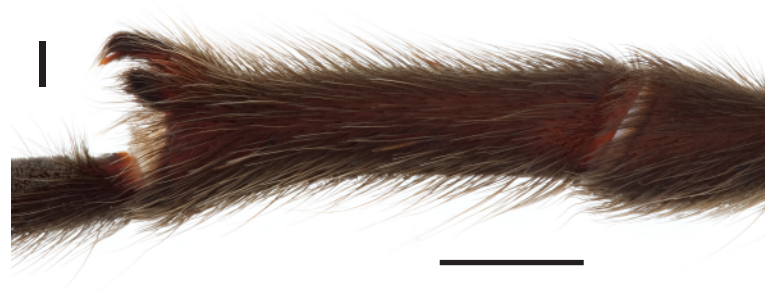

Supplement: Supplementary file 17

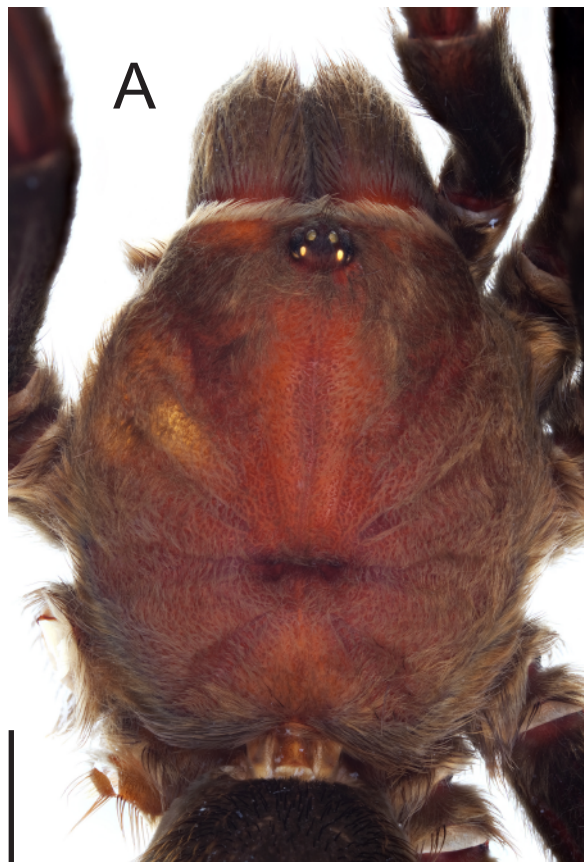

*Aphonopelma*  
*anax*

♂

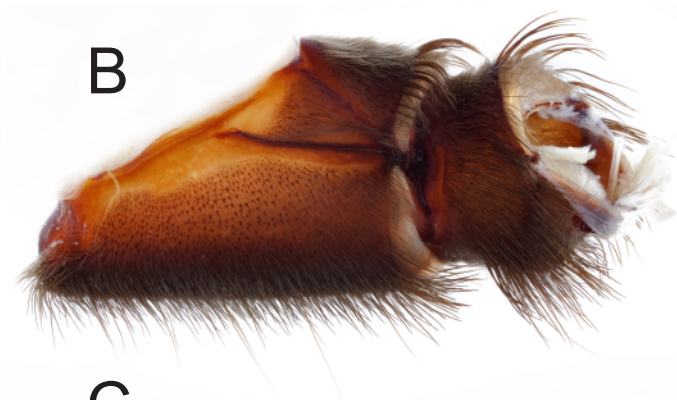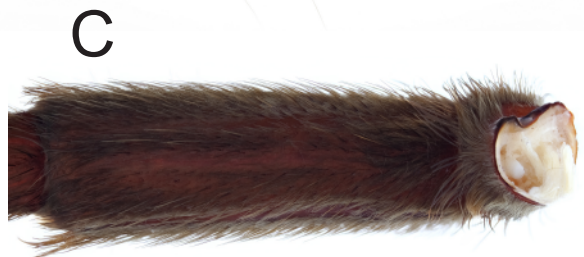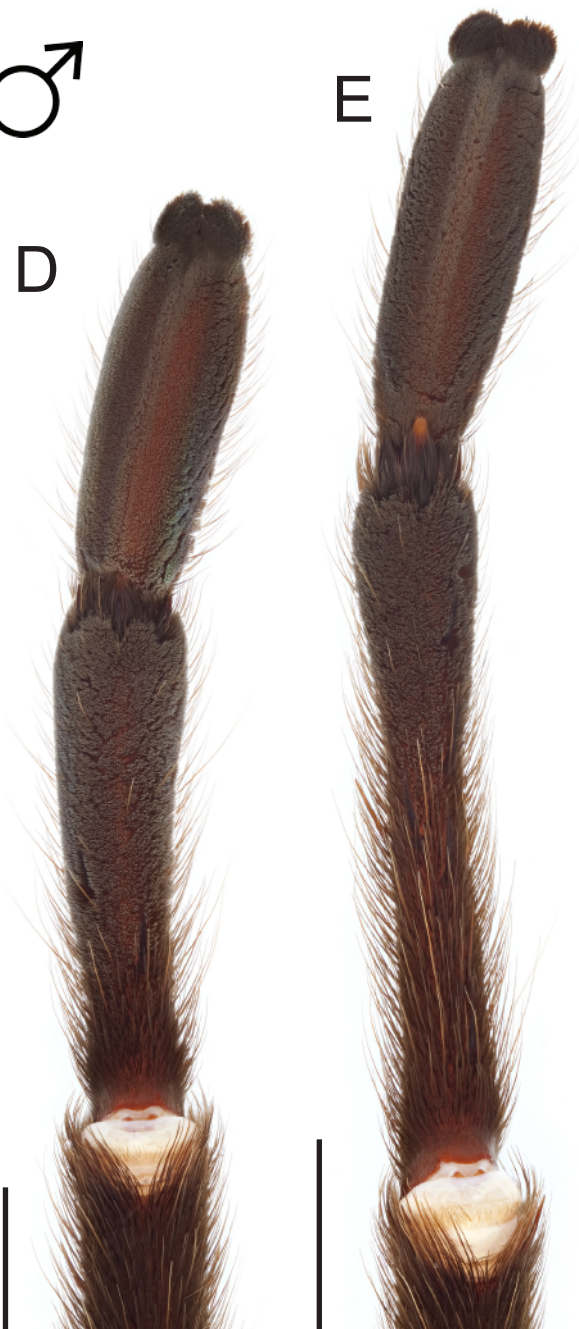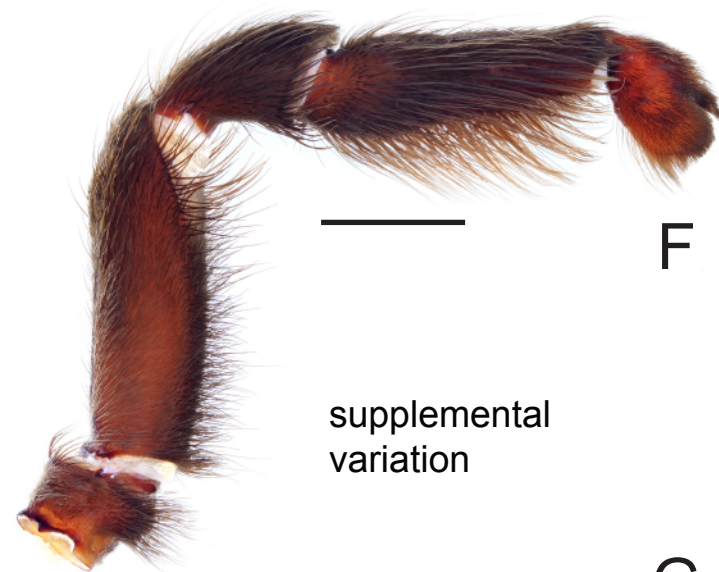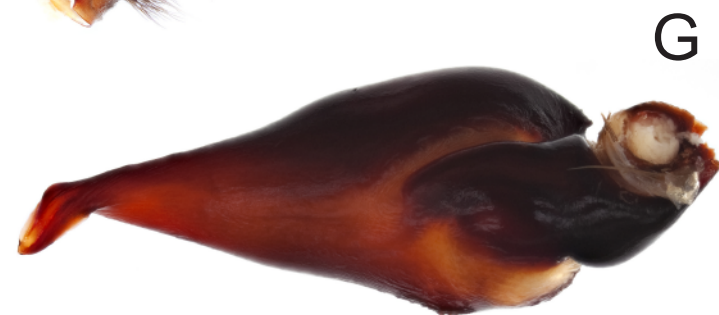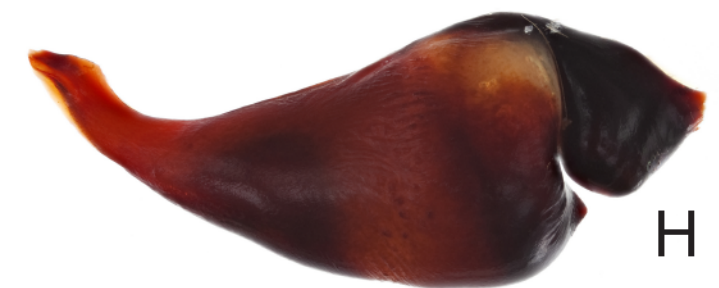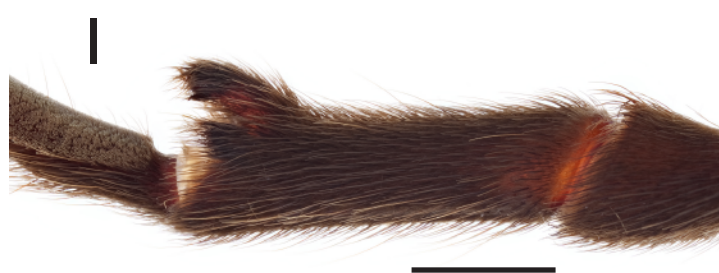

Supplement: Supplementary file 18
